# Supplementary material
Source: PubMed Central journal article supplement (PMC3206139)
Supplement: NIHMS323375-supplement-1.pdf [file NIHMS323375-supplement-1.pdf]

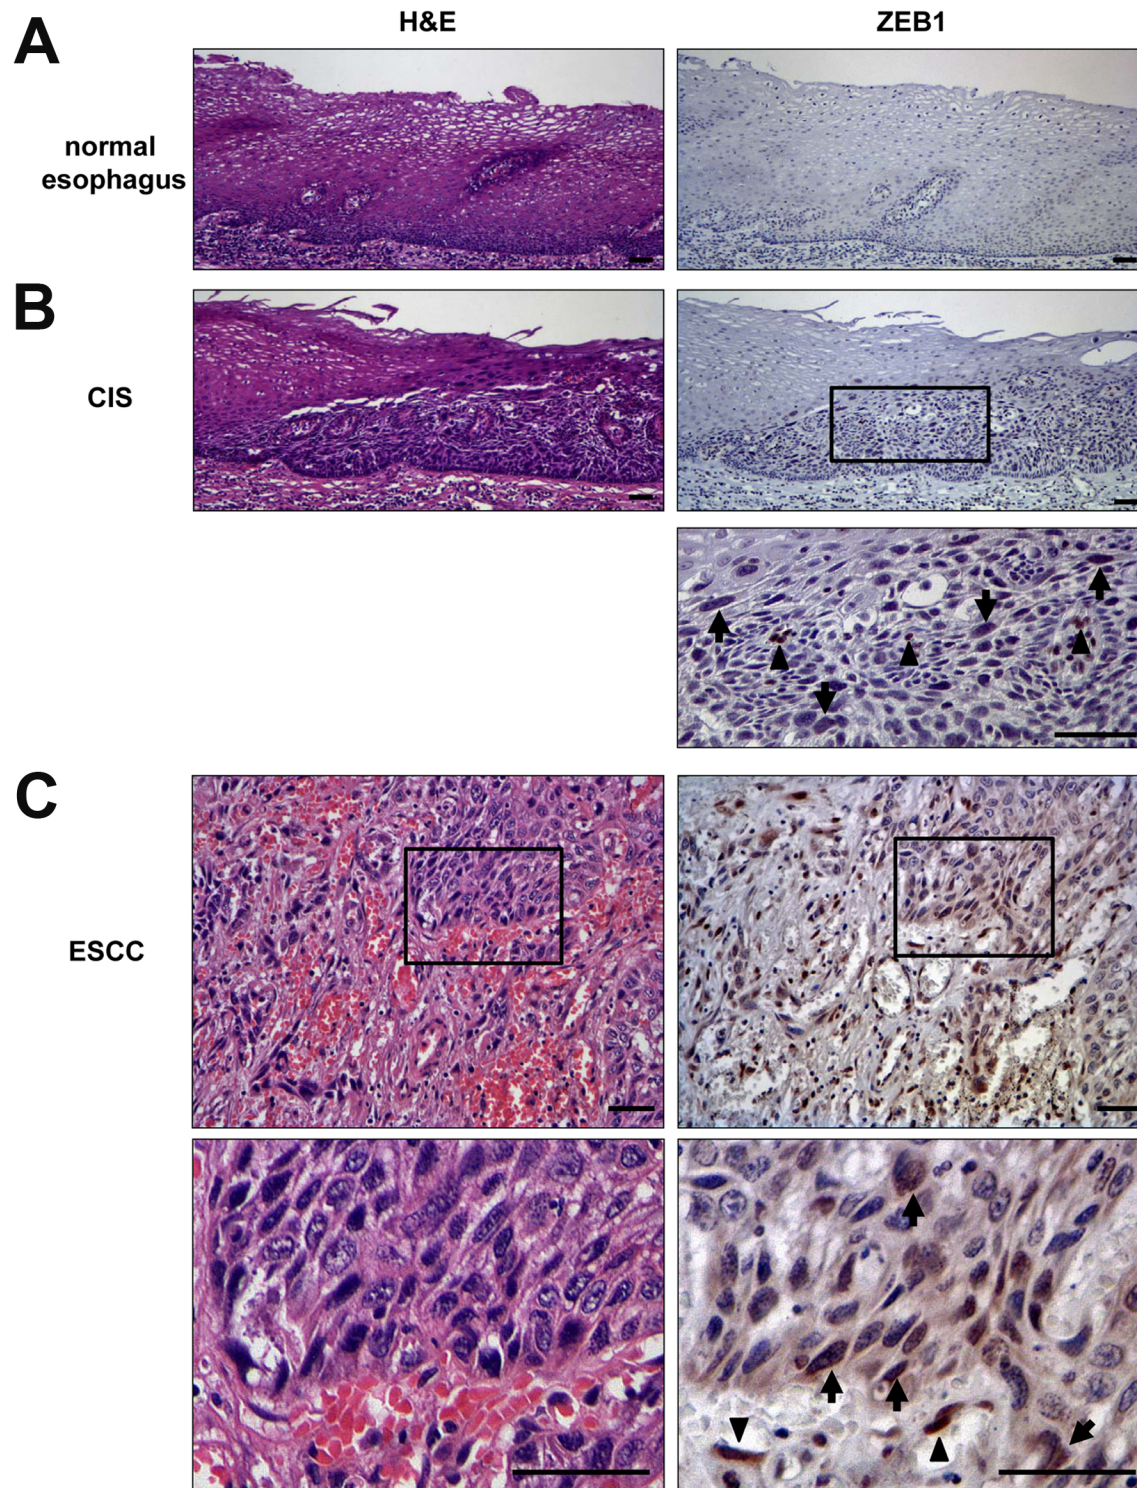

**Supplementary Fig. S1 ZEB1 expression in the normal esophageal epithelium, carcinoma *in situ* and invasive ESCC**

Representative images for H&E and corresponding IHC in normal mucosa of the esophagus (**A**) carcinoma *in situ* (**B**) and invasive ESCC (**C**). The selected areas were enlarged in the respective lower panels. Note that ZEB1 positive tumor cells tend to be spindle-shaped (arrows). Stromal inflammatory cells and fibroblasts (arrow heads) are also positive for ZEB1. Scale bar, 100  $\mu$ m.

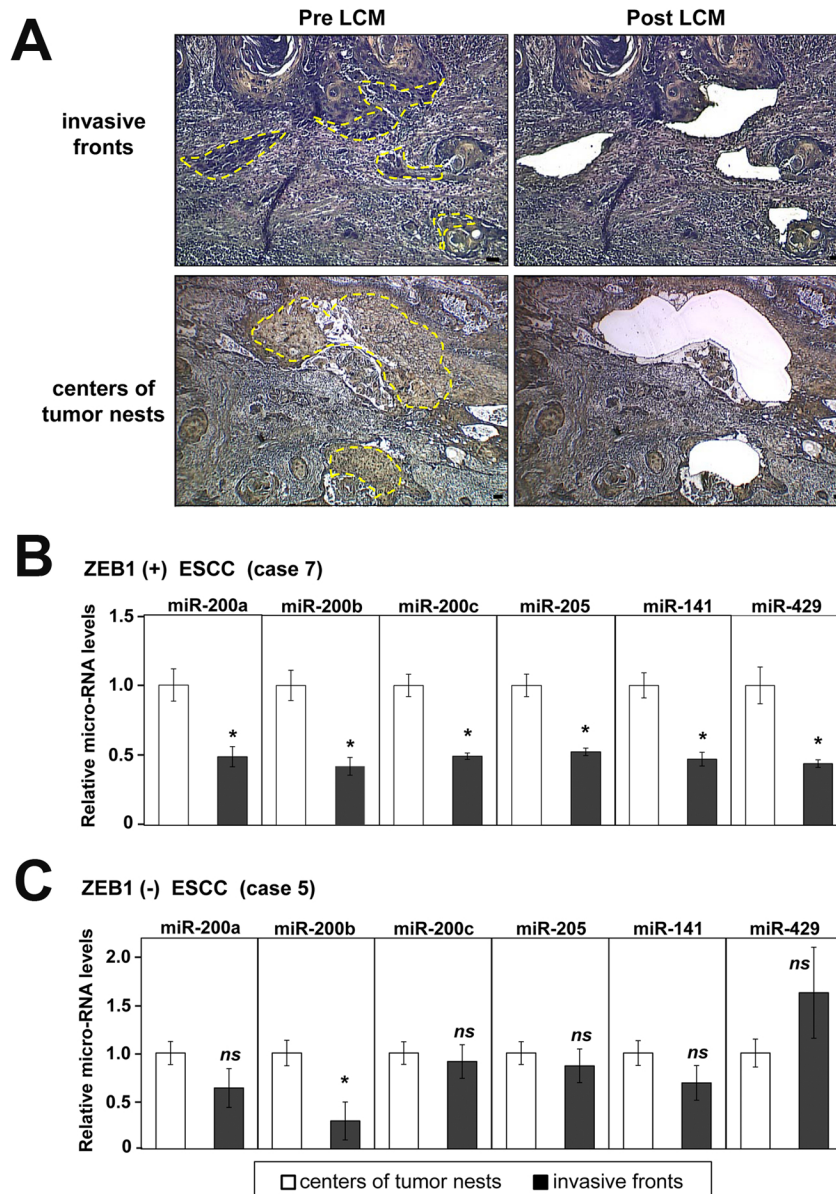

## Supplementary Fig. S2 LCM reveals downregulation of the miR-200 family members in the ZEB1-positive invasive fronts of ESCC

**A.** LCM isolated invasive areas (**top**) and the center of tumor nests (**bottom**) demarcated by yellow broken lines within identical tumors for real-time RT-PCR to compare the expression of the miR-200 family members and related micro-RNAs implicated in negative regulation of ZEBs (i.e. miR-200a, 200b, 200c, 205, 141 and 429).

**B.** Histograms show miR-200 family expression in a representative ZEB1 positive ESCC sample (case 7 in **Supplementary Table S3**) identical to that used for IHC in **Fig. 1B**. Note that similar results were obtained in two other ZEB1 positive samples tested (not shown). \*,  $P < 0.01$  versus centers of tumor nests ( $n=3$ ). Two other ZEB1 positive samples also showed a significant downregulation in at least 5 out of 6 of the miR-200 family and related micro-RNAs tested (data not shown).

**C.** Histograms show miR-200 family expression in a representative ZEB1 negative ESCC sample (case 5 in **Supplementary Table S3**). Similar results were obtained in two other samples tested (data not shown) where less than 2 out of 6 of the tested microRNAs were significantly downregulated. \*,  $P < 0.01$  versus centers of tumor nests ns, not significant vs. centers of tumor nests ( $n=3$ ).

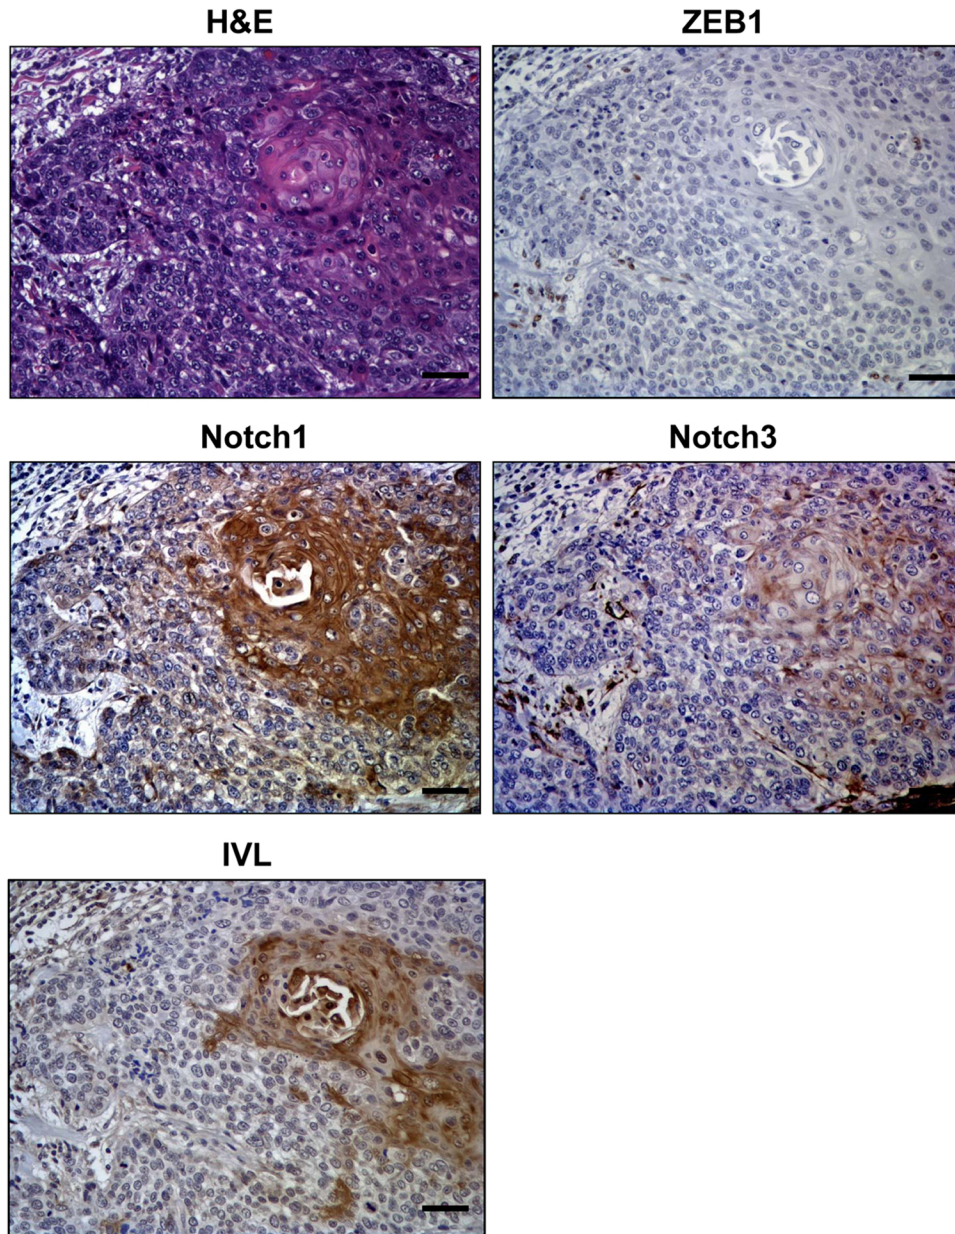

**Supplementary Fig. S3 NOTCH1 and NOTCH3 are localized in the well-differentiated tumor nests in ESCC**

Representative images for H&E and corresponding IHC on the serial sections. Note that IVL was expressed in the well-differentiated tumor nests forming a keratin pearl surrounded by less-differentiated tumor cells. NOTCH1 and NOTCH3 were co-localized with IVL. ZEB1 was not detected in this sample. Scale bar, 100  $\mu$ m.

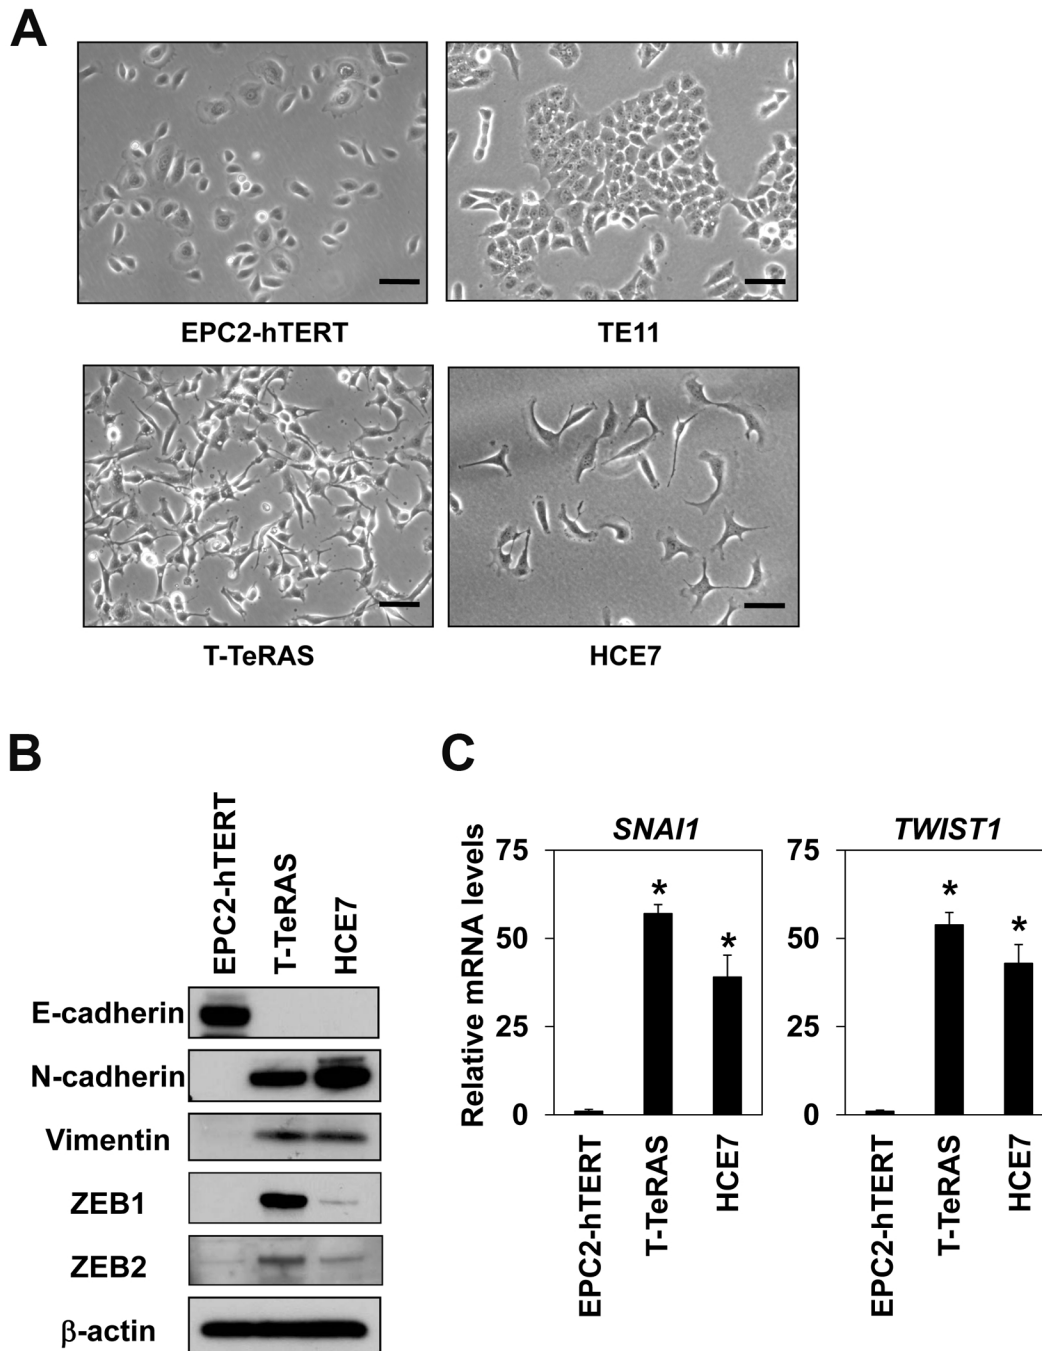

**Supplementary Fig. S4 Spindle-shaped morphology and mesenchymal traits in cell lines with upregulation of ZEBs**

**A.** Phase contrast images were taken for indicated cell lines. T-TeRas cells derive from non-transformed EPC2-hTERT cells (6-7). Note that ZEBs were highly expressed in T-TeRAS and HCE7 at the mRNA level (**Fig. 2A**). Unlike TE11 cells with epithelioid-cell appearance, T-TeRAS and HCE7 cells show downregulation of CK13 (**Fig. 2A**), an esophagus-specific early differentiation marker, implying impaired commitment to esophageal squamous differentiation. Scale bar, 50  $\mu$ m.

**B.** Western blotting documents mesenchymal characteristics in T-TeRas and HCE7 cells.  $\beta$ -actin served as a loading control.

**C.** Quantitative real-time RT-PCR determined relative mRNA levels for indicated genes.  $\beta$ -actin served as an internal control. \*,  $P < 0.01$  vs. EPC2-hTERT (n=3).

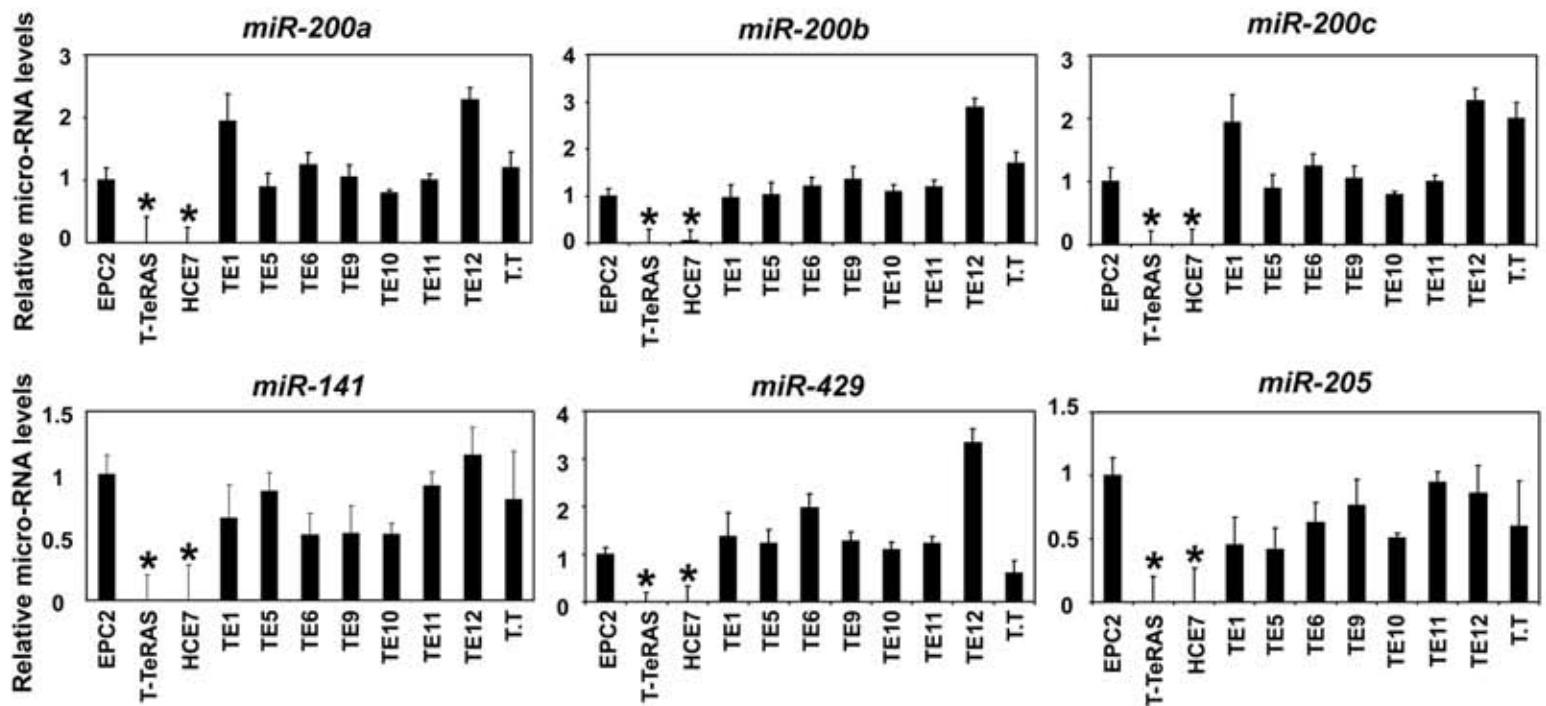

**Supplementary Fig. S5 Reciprocal downregulation of the miR-200 family in ESCC cell lines with upregulation of ZEBs**

Expression of the miR-200 family members and related micro-RNAs was determined in indicated cell lines by real-time RT-PCR with U47 as an internal control. EPC2, EPC2-hTERT cells.  $P < 0.01$  vs. EPC2 (n=3).

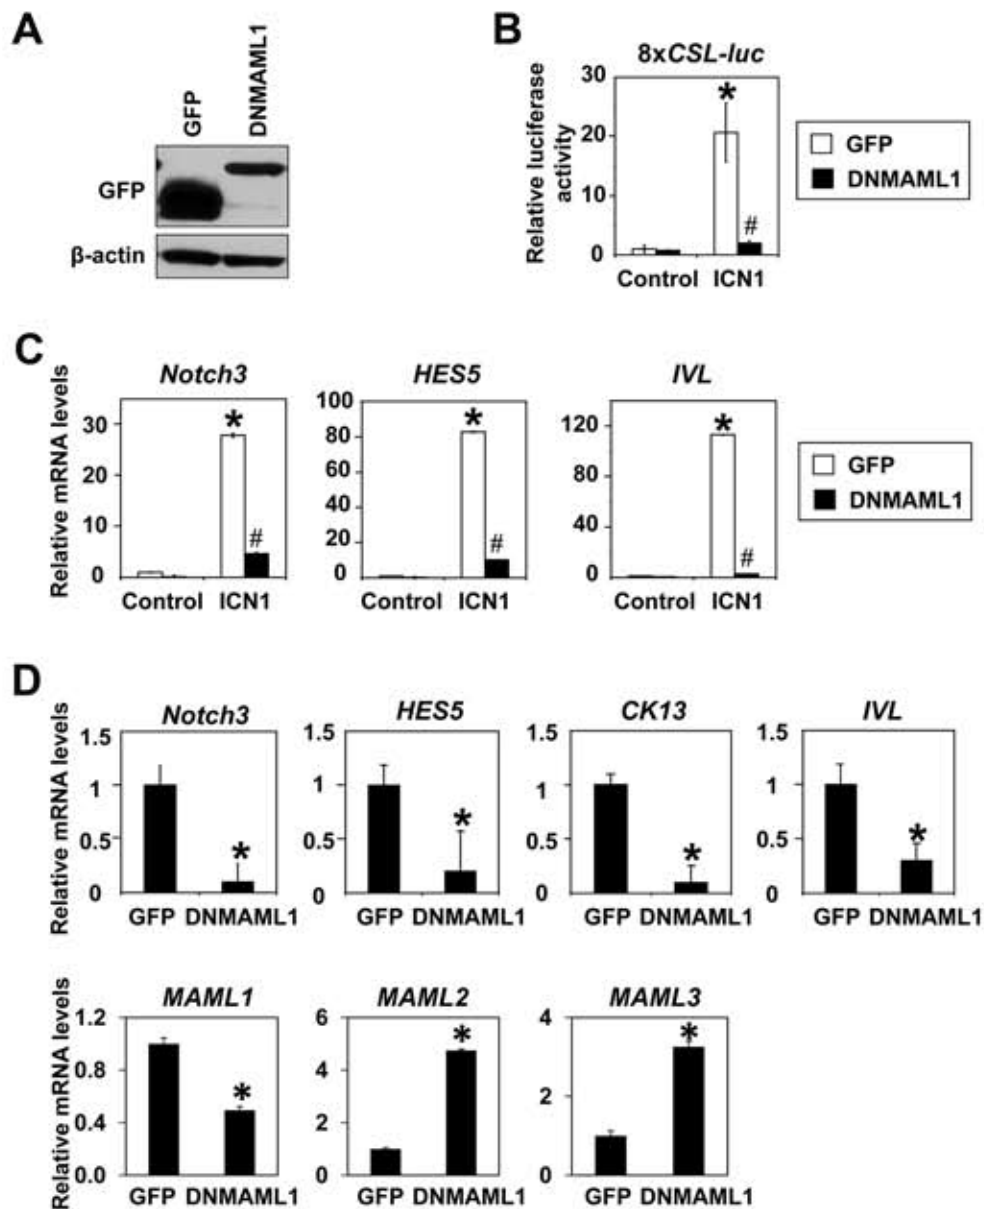

### Supplementary Fig. S6 Notch inhibitory effect of DNMAML1 in EPC2-T cells

Functional consequences of DNMAML1 expression upon CSL-dependent transcription as well as induction of Notch target genes were assessed in EPC2-T cells.

**A.** Western blotting was done on whole cell lysates to document expression of DNMAML1 (GFP-fusion protein) or GFP (control) with an anti-GFP antibody.  $\beta$ -actin served as a loading control.

**B.** Luciferase assays determined the 8xCSL-luc reporter activity by co-transfection of either an ICN1 expression construct (ICN1) or an empty (Control) plasmid in the cells with or without DNMAML1.

\* $P < 0.001$  vs. GFP plus Control; # $P < 0.001$  vs. GFP plus ICN1 (n = 6).

**C.** Real-time RT-PCR determined mRNA for indicated Notch target genes upon ectopic expression of ICN1 by retrovirus-mediated gene transfer. MigR1 (Control) was used as a control. Cells were lysed for RNA purification 3 days after infection.

\* $P < 0.001$  vs. GFP plus Control; # $P < 0.001$  vs. GFP plus ICN1 (n = 3).

**D.** Real-time RT-PCR determined mRNA for indicated Notch target genes at the basal level in the

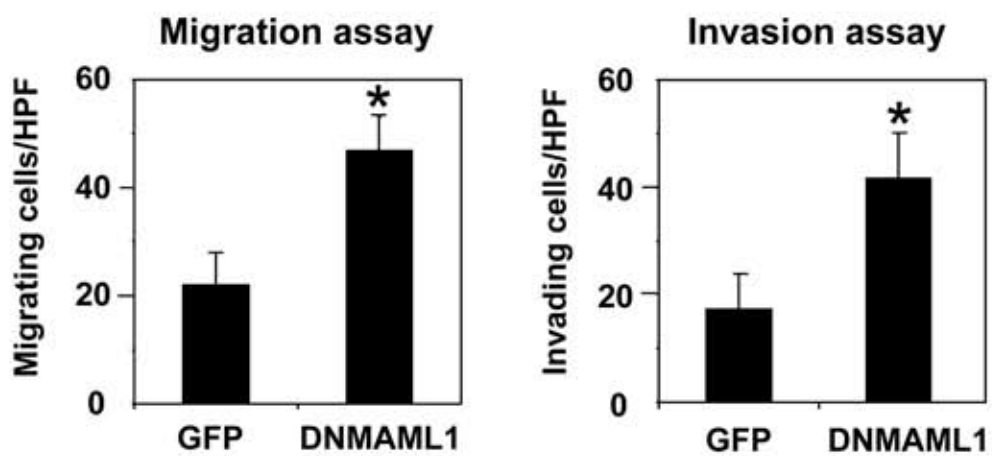

**Supplementary Fig. S7 DNMA1 facilitates cell migration and invasion**

Boyden chamber assays determined migration and invasion of EPC2-T cells with or without DNMA1. \* $P < 0.01$  vs. GFP (n = 3).

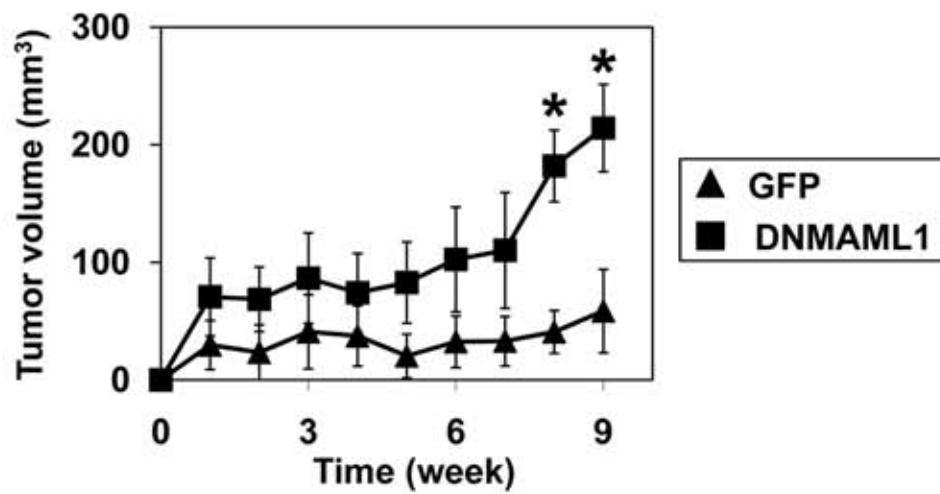

**Supplementary Fig. S8 DNMA11 enhanced xenograft tumor growth**

Change in tumor volume was monitored as a function of time in EPC2-T cells with or without DNMA11. \* $P < 0.01$  vs. GFP (n = 8).



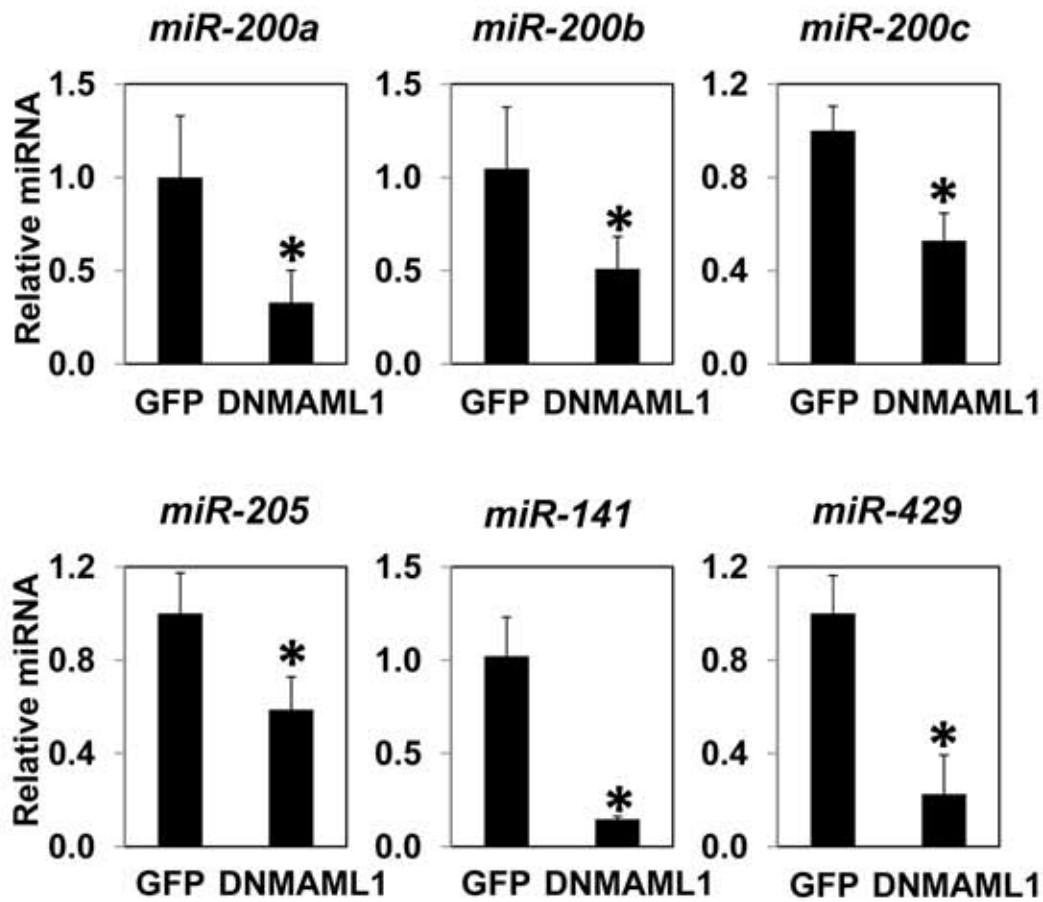

**Supplementary Fig. S9 DNMA11 suppressed the miR-200 family**

Expression of the miR-200 family members and related micro-RNAs in EPC2-T cells expressing either DNMA11 or GFP (control) was determined by real-time RT-PCR with U47 as an internal control.  $P < 0.01$  vs. GFP (n=3).

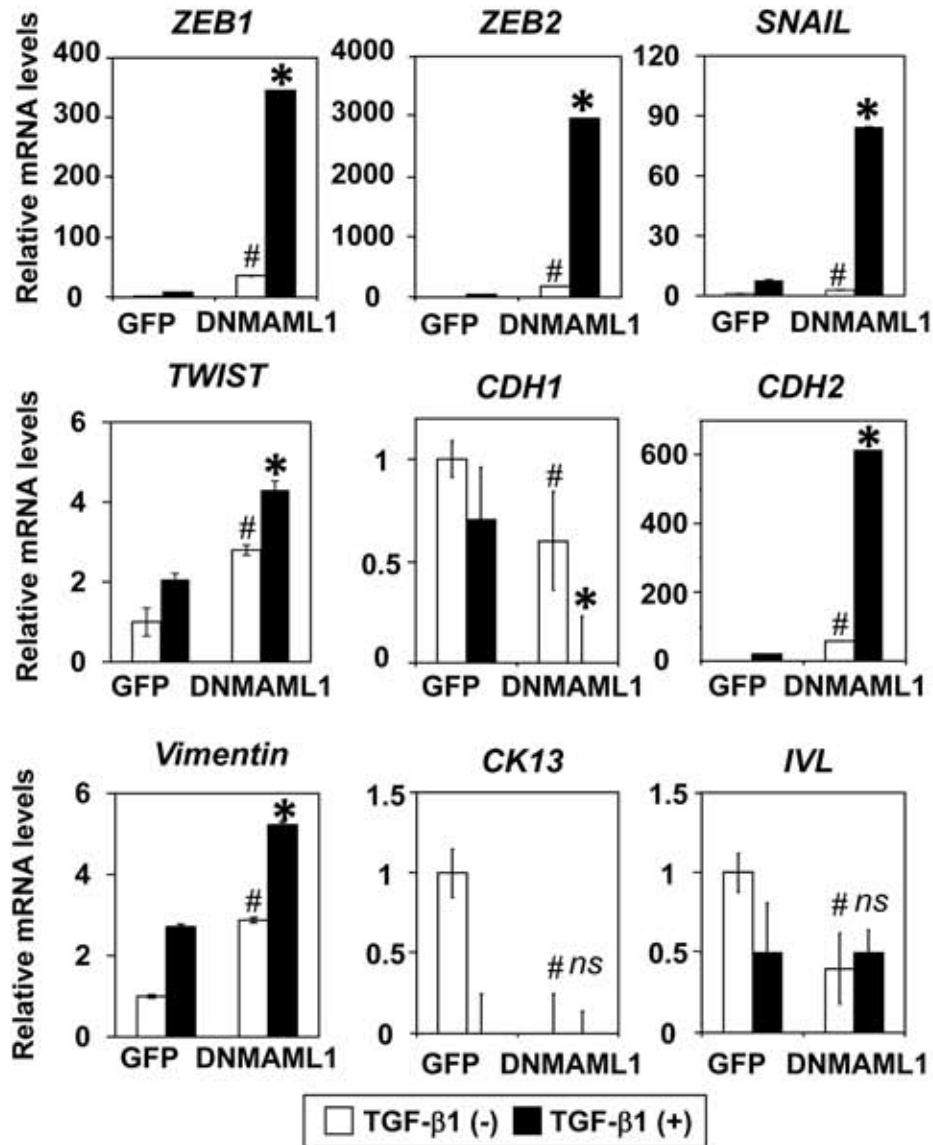

**Supplementary Fig. S10 TGF-β1 stimulated ZEBs and EMT markers in the presence of DNMAAML1 without promoting squamous cell differentiation.**

Real-time RT-PCR determined mRNA for indicated genes in EPC2-T cells expressing either DNMAAML1 or GFP (control). β-actin served as an internal control.

*CDH1*, E-cadherin; *CDH2*, N-cadherin; \*,  $P < 0.01$  versus GFP plus TGF-β1 (+);

#,  $P < 0.05$  versus GFP plus TGF-β1 (-); ns, not significant vs. DNMAAML1 plus TGF-β1 (-) or GFP plus TGF-β1 (+) (n=3).

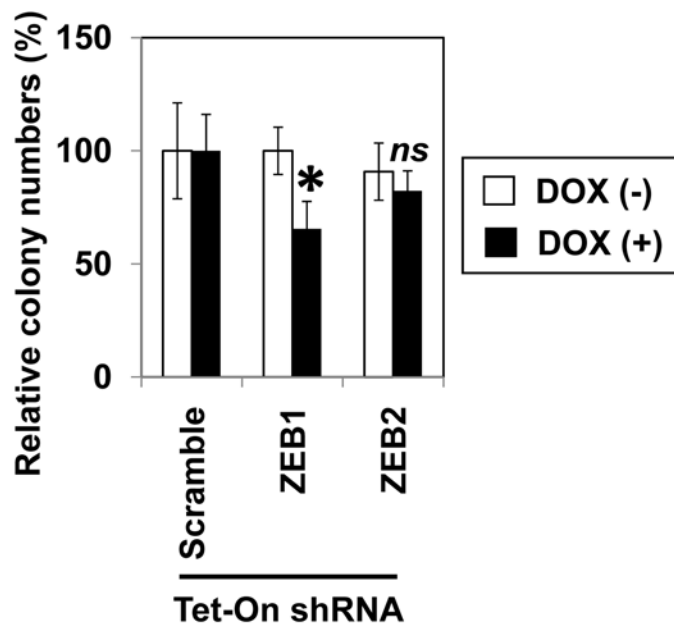

**Supplementary Fig. S11 ZEB1 regulates anchorage independent growth of EPC2-T cells with DNAML1**

EPC2-T cells expressing DNAML1 expressing tetracycline-inducible (Tet-On) shRNA were grown in soft agar in the presence or absence of 1 µg/ml of doxycycline (DOX) for 2 weeks and photomicrographed. Colony number was determined. Representative data are shown with comparable results using two independent shRNA sequences. \*,  $P < 0.01$  vs. DOX (+) plus scramble; *ns*, vs. DOX (+) plus scramble; n=6. There was no significant change in colony size upon shRNA induction.

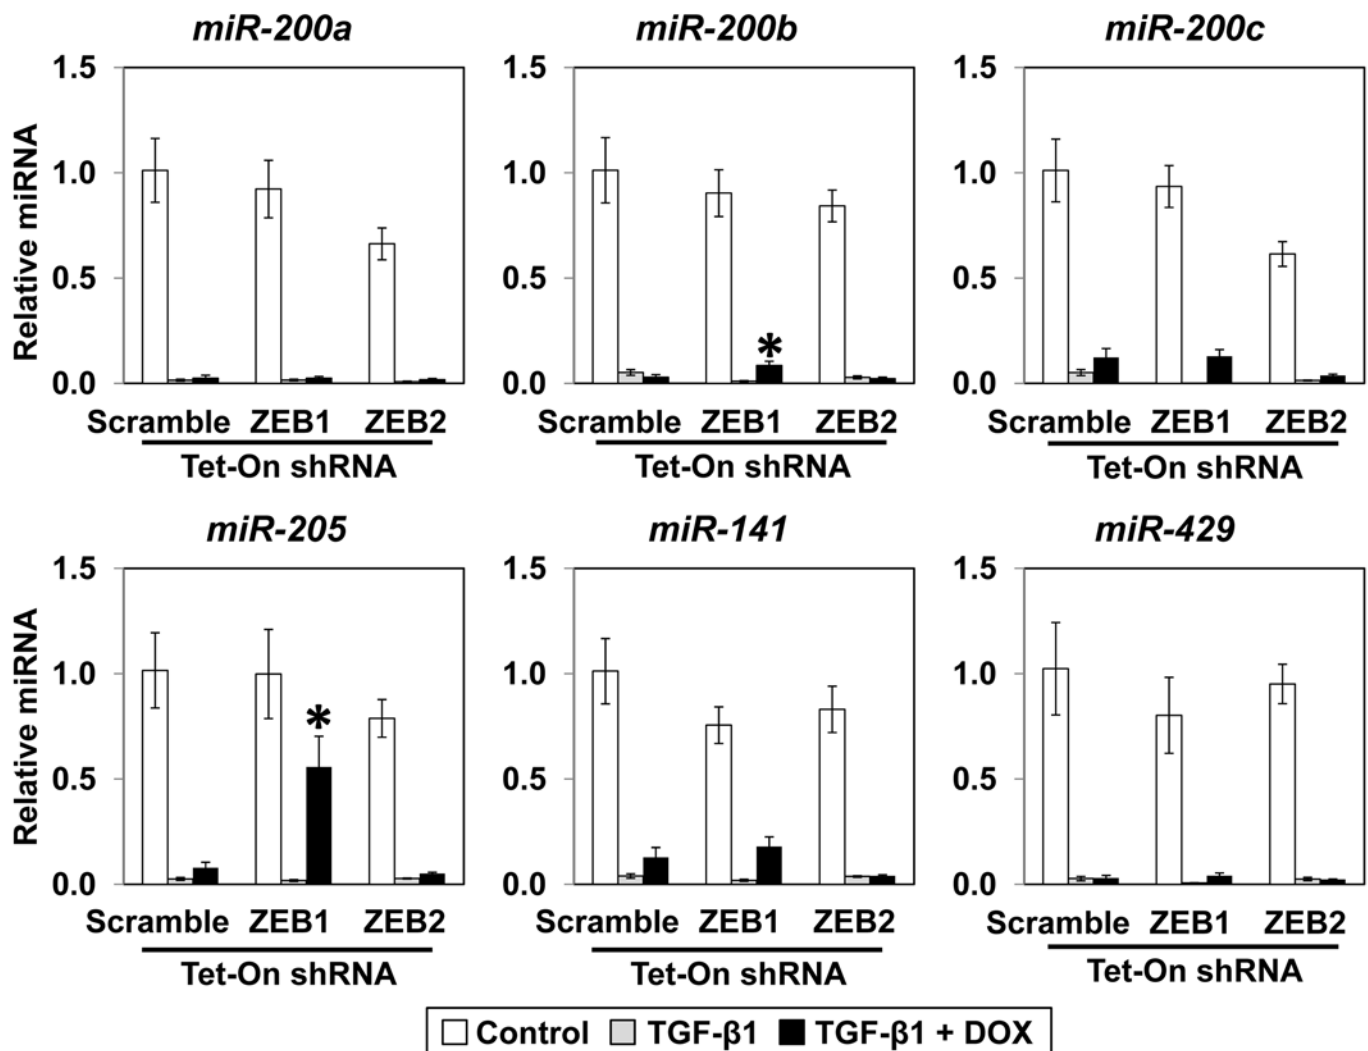

**Supplementary Fig. S12**      **ZEB1 knockdown restores partially the miR-200 family expression in EPC2-T cells with DNMA11**

EPC2-T cells expressing DNMA11 along with tetracycline-inducible (Tet-On) shRNA directed against either ZEB1, ZEB2 or a non-silence control sequence (Scramble) were subjected to TGF-β1 stimulation along with or without 1 μg/ml of doxycycline (DOX) for 2 weeks as demonstrated in **Fig. 5**. Expression of the miR-200 family members and related micro-RNAs was determined by real-time RT-PCR with U47 as an internal control. Representative data are shown with comparable results using two independent shRNA sequences.  $P < 0.01$  vs. TGF-β1 plus DOX (+) plus scramble (n=3).

Note that TGF-β1 alone reduced sharply the expression of the miR-200 family. ZEB1 knockdown restored the expression of miR-205 and miR-200b only to a limited extent, implying the involvement of both ZEBs and/or other factors in the miR-200 family regulation.

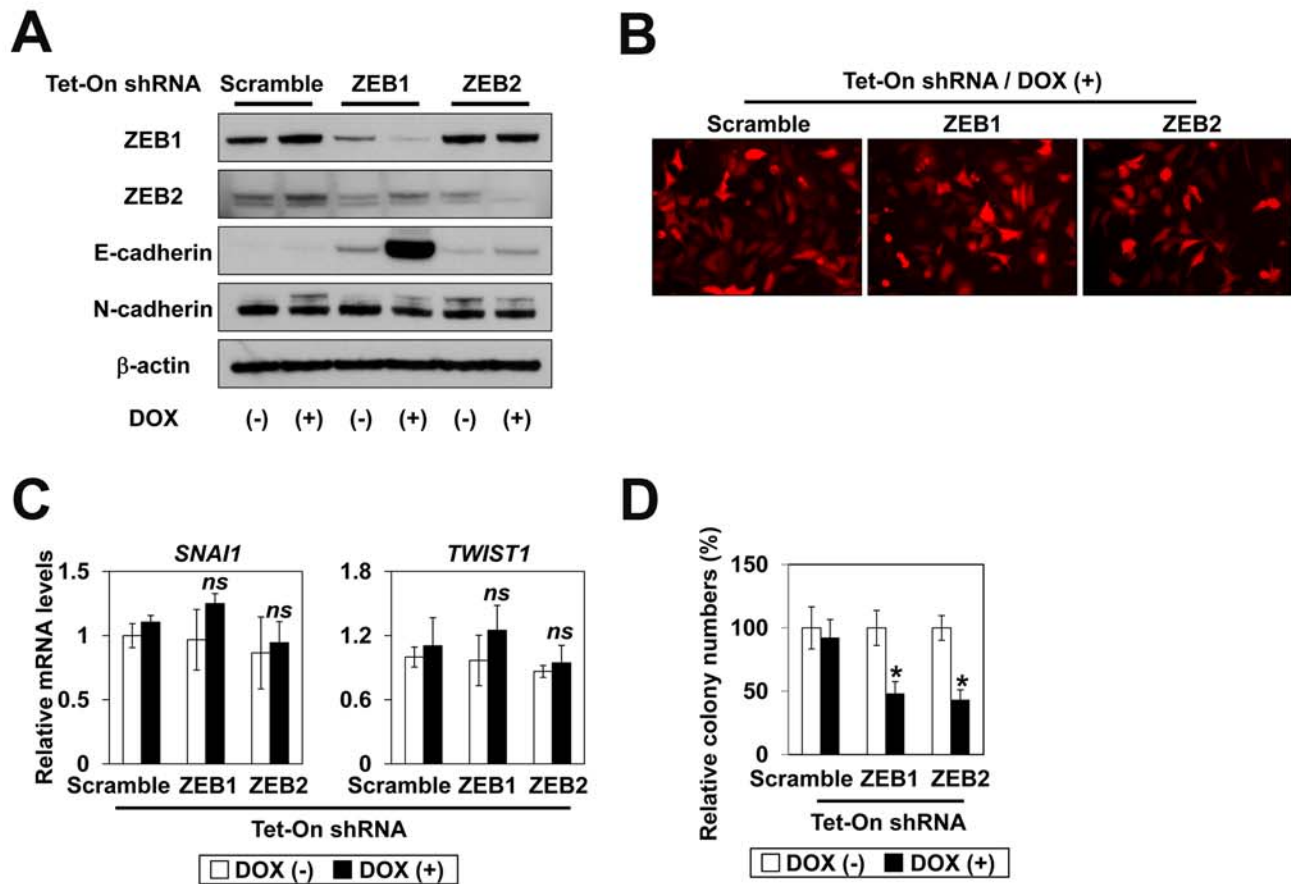

### Supplementary Fig. S13 ZEBs repress E-cadherin and regulate anchorage independent growth in HCE7 cells

HCE7 cells expressing tetracycline-inducible (Tet-On) shRNA directed against either ZEB1, ZEB2 or a non-silence control sequence (Scramble) were treated with or without 1  $\mu$ g/ml of doxycycline (DOX) for 72 hours (A-C) and 2 weeks (D). HCE7 cells are fully mesenchymal without TGF- $\beta$  stimulation (Fig. 2 and supplementary Fig. S4). Representative data are shown with comparable results using two independent shRNA sequences.

**A.** Western blotting determined indicated molecules with  $\beta$ -actin as a loading control. Note that knockdown of ZEB1 induce d E-cadherin robustly compared to knockdown of ZEB2. There was little effect upon N-cadherin expression by knockdown of ZEBs.

**B.** Fluorescent photomicrographs taken at 72 hrs after DOX treatment documented robust expression of shRNA sequences through co-expressed TurboRFP red fluorescent protein under the tetracycline-operated promoter confirm. No significant morphological change was observed upon knockdown of ZEBs. Flow cytometry also validated TurboRFP induction in > 97% cells (data not shown).

**C.** Real-time RT-PCR determined mRNA for indicated genes with  $\beta$ -actin as an internal control. ns. not significant vs. scramble plus DOX(+)(n=3). Note that the basal level of *SNAI1* and *TWIST1* in HCE7 cells is high (supplementary Fig. S4).

**D.** Cells were grown in soft agar in the presence or absence of 1  $\mu$ g/ml of DOX for 2 weeks and photomicrographed to determine colony number. \*,  $P < 0.01$  vs. DOX (+) plus scramble (n=6). There was no significant change in colony size upon shRNA induction.

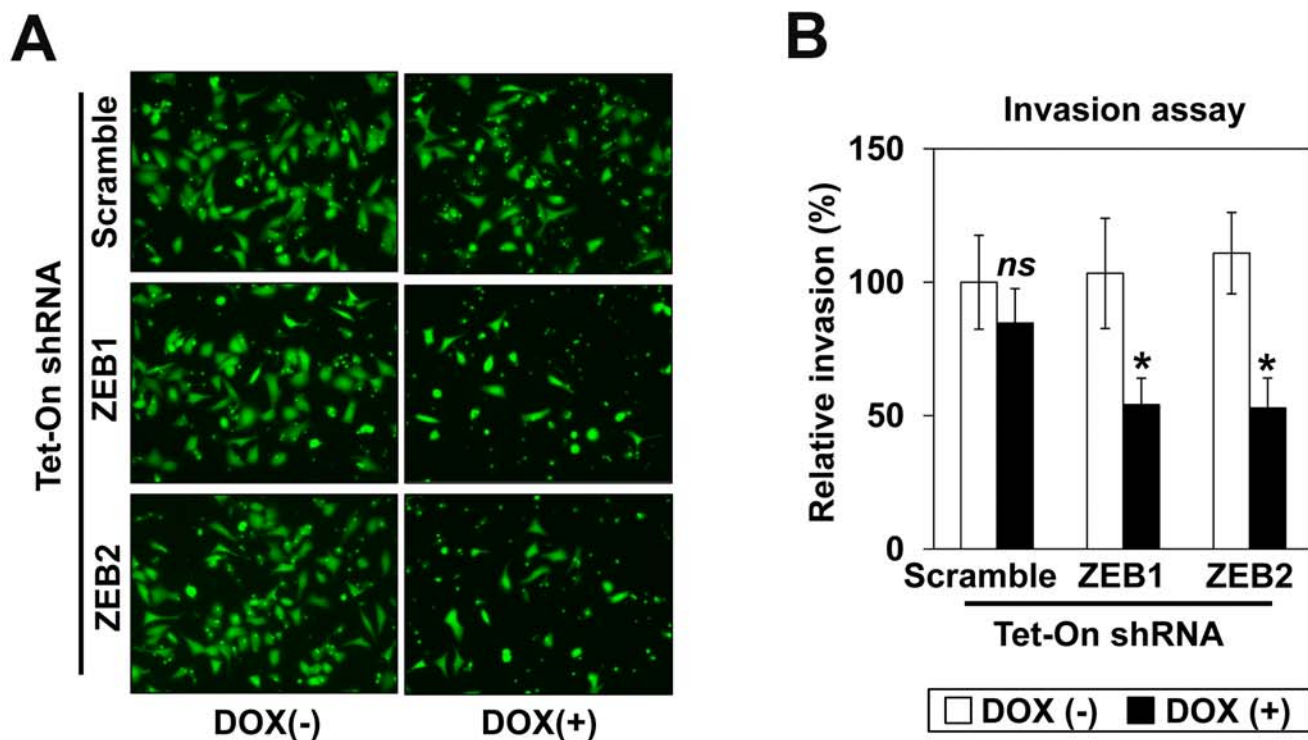

**Supplementary Fig. S14 ZEB1 regulates invasion in HCE7 cells**

Boyden chamber assays determined invasion of HCE7 cells expressing tetracycline-inducible (Tet-On) shRNA directed against either ZEB1, ZEB2, or a non-silencing control sequence (Scramble). For shRNA induction, cells were pretreated with 1  $\mu\text{g/ml}$  of doxycycline (DOX) for 72 hrs prior to Boyden chamber assays. Cell invasion was monitored in the presence or absence of 1  $\mu\text{g/ml}$  of DOX for 16 hrs. Photomicrograph images of cells stained with Calcein AM dye were shown in (A) with an accompanying quantified histogram in (B). Representative data are shown with comparable results using two independent shRNA sequences. \*,  $P < 0.01$  vs. DOX (+) plus scramble; ns, not significant vs. DOX (-);  $n=3$ .

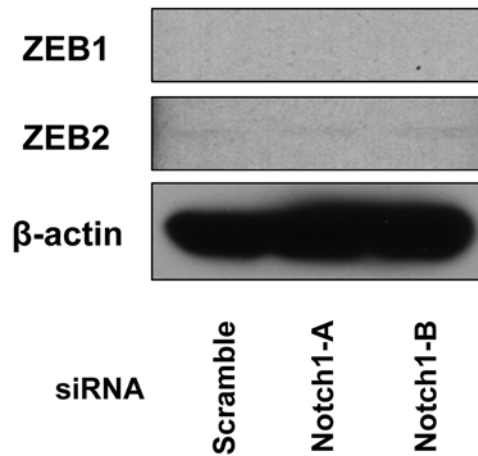

**Supplementary Fig. S15 Inhibition of NOTCH1 does not have an immediate impact upon the basal level of ZEB1 and ZEB2.**

EPC2-hTERT cells were transiently transfected with siRNA directed against NOTCH1 and subjected to RNA analysis 72 hrs after transfection. Western blotting was done for indicated molecules. The NOTCH1 knockdown effects upon NOTCH1 per se and NOTCH3 were previously demonstrated at the mRNA and protein levels (1).  $\beta$ -actin served as loading control. Note that ZEB1 and ZEB2 were barely detectable in non-transformed EPC2-hTERT cells .

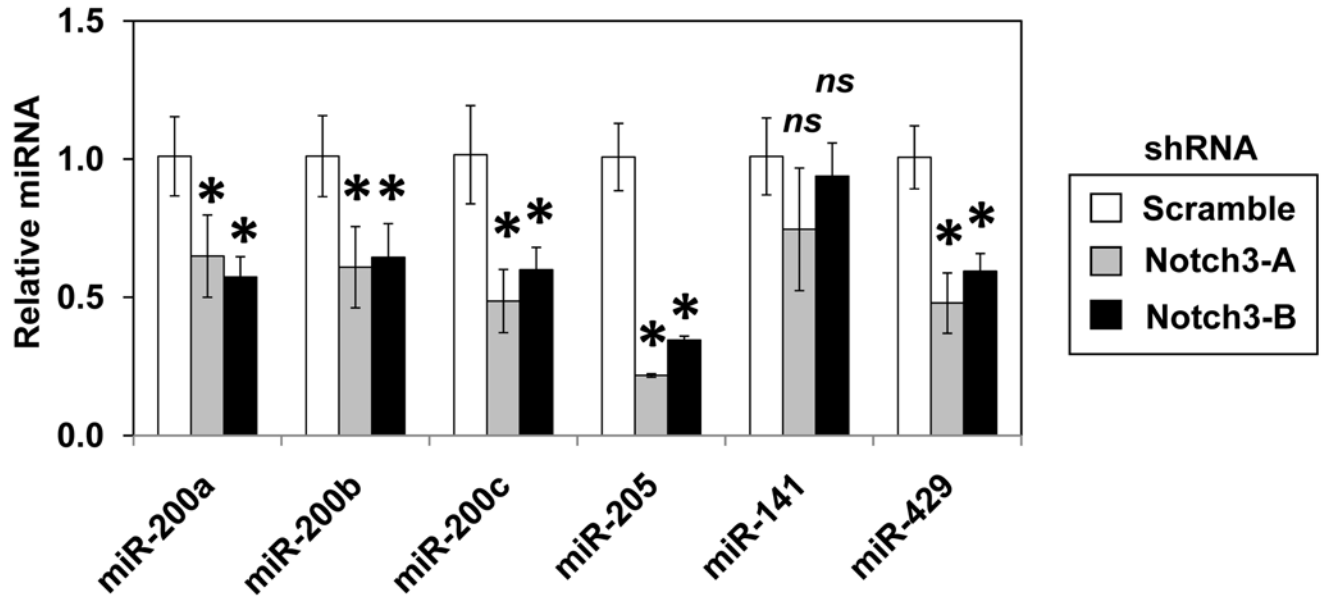

**Supplementary Fig. S16 NOTCH3 knockdown suppresses the miR-200 family**

Real-time RT-PCR determined the miR-200 family members and related micro-RNAs in EPC2-hTERT derivatives expressing independent shRNA sequences directed against NOTCH3 (Notch3-A and Notch3-B) or a non-silencing control sequence (scramble). U47 served as an internal control. \*,  $P < 0.01$  vs. scramble; *ns*, not significant vs. scramble (n=3).



## **Supplementary Methods**

### **Laser capture microdissection (LCM)**

LCM was done using the Leica SVS LMD system (Leica Microsystems, Wetzlar, Germany) upon 5 $\mu$ m-thick paraffin embedded ESCC tissue sections. Under the microscopic guidance, Cresyl Violet (Applied Biosystems, Foster City, CA) stained cancer cells at the center of the tumor nests and those at the invasive fronts were selectively dissected, and subjected to Proteinase K treatment 55°C for 12 h and RNA purification with PureLink™ miRNA isolation kit (Invitrogen, Carlsbad, CA, USA).

RNA purified from the LCM samples was subjected to miScript Primer Assays with the miScript SYBR Green PCR Kit for real-time PCR to determine mature miR-200a, miR-200b, miR-200c, miR-205, miR-141 and miR-429 using U6 small nuclear RNA as an inner control according to the manufacturer's instructions.

### **Luciferase assays**

Transient transfection and luciferase assays were done as described previously (1). Briefly, 200 ng of 8x*CSL-luc* (2), a reporter plasmid containing eight copies of the CSL DNA binding consensus sequence was transfected along with either 200 ng of an ICN1 expression vector (3) or a control empty vector (p3XFLAG-CMV-7). Cells were incubated for 48 hrs before cell lysis. The mean of firefly luciferase activity was normalized with the co-transfected renilla luciferase activity.

### **Migration and invasion assays**

Cell migration and invasion assays were done using Boyden chambers as described previously (4-5). In brief,  $3 \times 10^4$  cells were suspended in base medium devoid of growth factors and placed in each insert coated with or without Matrigel matrix (BD Biosciences Co., Franklin, NJ). Cells were allowed to move toward full media filled in the bottom well for 16 hrs and stained with Diff Quick staining kit (Dade Behring, Newark, DE) for EPC2-T cell derivatives and 4  $\mu\text{g/ml}$  Calcein AM dye (Invitrogen) for HCE7 cell derivatives to determine the moved cells. All Boyden chamber assays were performed at least three times in triplicate.

## **Supplementary Table S1**

### **Taqman<sup>®</sup> Gene Expression assays (Applied Biosystems)**

IVL, Hs00846307\_s1

CK13, Hs00999762\_m1

HES5Hs01387463\_g1

Notch1, Hs01062014\_m1

Notch3, Hs00166432\_m1

ZEB1, Hs00232783\_m1

ZEB2, Hs00207691\_m1

CDH1(E-cadherin), Hs00170423\_m1

CDH2(N-cadherin), Hs00983062\_m1

### **Taqman MicroRNA<sup>®</sup> Assays (Applied Biosystems) used for cultured cells**

hsa-miR-200a (000502)

hsa-miR200b (001800)

hsa-miR-200c (000505)

has-miR-141 (000463)

has-miR-205 (000509)

has-miR-429 (001024)

U47 (001223) as an internal control

## Supplementary Table S2 Antibodies used

### Western blotting

IVL, Mouse monoclonal anti-Involucrin

(CloneSY5)(Sigma-Aldrich, St Louis, MO), Cat# I 9018, (1:1000)

$\beta$ -actin, Mouse monoclonal anti- $\beta$ -actin antibody

AC-74 (Sigma Aldrich), Cat# A5316, (1:30,000)

Histone H1, Mouse monoclonal anti-Histone H1 antibody

AE4 (Santa Cruz Biotechnology, Santa Cruz, CA), Cat# sc-8030, (1:250)

GFP, Rabbit polyclonal anti-GFP antibody

(Cell Signaling, Danvers, MA), Cat#2555, (1:1000)

ICN1, Rabbit, monoclonal anti-cleaved NOTCH1 antibody (Val1744)

D3B8 (Cell Signaling), Cat# 4147, (1:1000)

ICN3, Rat monoclonal anti-NOTCH3 antibody

8G5 (Cell Signaling), Cat#3446, (1:1000)

ZEB1, Rabbit monoclonal anti-ZEB1 antibody

D80D3 (Cell Signaling), Cat#3396, (1:1000)

ZEB2, Rabbit polyclonal anti-ZEB2 antibody

H-260 (Santa Cruz), Cat# sc-48789, (1;200)

E-cadherin, Mouse monoclonal anti-E-cadherin antibody

Clone36 (BD Transduction Laboratories, San Jose, CA), Cat#610181, 1:3000

N-cadherin, Mouse monoclonal anti-N-cadherin antibody

Clone 32 (BD Transduction Laboratories), Cat#610920, 1:250

## **IHC and IF**

ZEB1, rabbit serum (8)(1:2000 at 4°C overnight)/sections microwaved at pH6.0

Notch1, Rabbit polyclonal anti-NOTCH1 antibody (Abcam, Cambridge, MA),

Cat# ab27526, (1:500 at 4°C overnight)/sections microwaved at pH3.0

Notch3, Rabbit polyclonal anti-NOTCH3 antibody (Abcam)

Cat# ab23426, (1:2000 at 4°C overnight)/sections microwaved at pH3.0

CK14, Rabbit polyclonal anti-CK14 antibody (Covance),

Cat# PRB-155P, (1:3000 at 4°C overnight)/sections microwaved at pH6.0

E-cadherin, Mouse monoclonal anti-E-cadherin antibody

Clone36 (BD Transduction Laboratories), Cat#610181, (1:250 at 4°C overnight)

IVL, Mouse monoclonal anti-involucrin clone Sy5 (Sigma-Aldrich),

Cat# I 9018, (1:750 at 4°C overnight)/sections microwaved at pH6.0

Note that IHC signals were developed using the diaminobenzidine (DAB) substrate kit (Vector Laboratories, Burlingame, CA) following incubation with secondary anti-mouse IgG (Vector)(1:100 at 37°C for 30 min) or anti-rabbit IgG (Vector)(1:200 at 37°C for 30 min), and counterstained with Hematoxylin (Fisher Scientific CS401-1D). For IF, Cyanine Cy2- or Cyanine Cy3-conjugated affinity-purified anti-mouse or anti-rabbit IgG (Jackson ImmunoResearch)(1:600) was used for signal detection by incubating at 37°C for 30 min, and cell nuclei were counterstained by 4'6-diamidino-2-phenylindole (DAPI)(1:10,000) (Invitrogen).

**Supplementary Table S3 Pathological characteristics and ZEB1 staining results of ESCC cases analyzed (n=51)**

| case# | age/sex | Diff* | pT <sup>a)</sup> | pN <sup>b)</sup> | ZEB1 | case# | age/sex | Diff* | pT | pN | ZEB1 |
|-------|---------|-------|------------------|------------------|------|-------|---------|-------|----|----|------|
| 1     | 66M     | W     | 2                | 0                | -    | 26    | 55M     | M     | 3  | 1  | -    |
| 2     | 49M     | W     | 3                | 1                | -    | 27    | 57M     | M     | 2  | 1  | +    |
| 3     | 66M     | P     | 3                | 0                | -    | 28    | 70F     | M     | 1  | 0  | +    |
| 4     | 59M     | W     | 3                | 2                | +    | 29    | 75M     | W     | 3  | 1  | +    |
| 5     | 76M     | M     | 3                | 0                | -    | 30    | 74M     | P     | 3  | 1  | -    |
| 6     | 76M     | M     | 3                | 1                | -    | 31    | 61M     | W     | 3  | 0  | -    |
| 7     | 52M     | M     | 3                | 1                | +    | 32    | 53M     | M     | 3  | 1  | -    |
| 8     | 50M     | M     | 2                | 4                | -    | 33    | 64M     | M     | 3  | 1  | -    |
| 9     | 64M     | M     | 3                | 0                | -    | 34    | 64M     | M     | 4  | 1  | -    |
| 10    | 66M     | P     | 4                | U                | -    | 35    | 54M     | M     | 2  | 1  | -    |
| 11    | 60M     | W     | 1                | 1                | -    | 36    | 56M     | P     | 1  | 1  | -    |
| 12    | 80M     | M     | 3                | 2                | -    | 37    | 77M     | P     | 3  | 1  | +    |
| 13    | 69M     | M     | 1                | 2                | -    | 38    | 71F     | W     | 2  | 0  | -    |
| 14    | 54M     | P     | 3                | 2                | +    | 39    | 58M     | P     | 3  | 1  | +    |
| 15    | 62M     | M     | 2                | U                | -    | 40    | 79M     | M     | 3  | 0  | +    |
| 16    | 65M     | W     | 3                | 0                | -    | 41    | 57M     | M     | 2  | 1  | +    |
| 17    | 78M     | P     | 3                | 2                | -    | 42    | 58M     | W     | 2  | 1  | -    |
| 18    | 76M     | M     | 2                | 2                | -    | 43    | 59M     | M     | 3  | 1  | +    |
| 19    | 79M     | M     | 3                | 2                | -    | 44    | 68M     | P     | 3  | 1  | +    |
| 20    | 61M     | W     | 3                | U                | -    | 45    | 66M     | W     | 3  | 1  | -    |
| 21    | 62M     | M     | 2                | 0                | -    | 46    | 76M     | M     | 3  | 1  | +    |
| 22    | 56M     | M     | 3                | 1                | -    | 47    | 60M     | M     | 3  | 1  | -    |
| 23    | 72M     | M     | 2                | 0                | +    | 48    | 74M     | W     | 3  | 1  | -    |
| 24    | 57F     | M     | 3                | 1                | +    | 49    | 52M     | M     | 3  | 1  | +    |
| 25    | 56M     | M     | 3                | 1                | +    | 50    | 63M     | M     | 1  | 0  | -    |
|       |         |       |                  |                  |      | 51    | 68F     | M     | 3  | 1  | -    |

Diff\*, differentiation; W, well; M, moderate; P, poor

- a) pT; pathologically assessed staging by the size of primary tumor and whether it has invaded nearby tissue
- b) pN; pathologically assessed staging by regional lymph nodes that are involved. U, unknown.

**Supplementary Table S4 Gene expression profiling in EPC2-hTERT cells**

**expressing shRNA directed against NOTCH3 vs. a non-silencing control sequence**

| Upregulated (> 10-fold) |             |             | Downregulated (> 10-fold) |                      |             |
|-------------------------|-------------|-------------|---------------------------|----------------------|-------------|
| Probeset ID             | Gene Symbol | Fold-Change | Probeset ID               | Gene Symbol          | Fold-Change |
| 229152_at               | C4orf7      | 1573.3      | 213796_at                 | SPRR1A               | -842.2      |
| 221731_x_at             | VCAN        | 1081.2      | 204994_at                 | MX2                  | -508.6      |
| 212488_at               | COL5A1      | 1006.6      | 218002_s_at               | CXCL14               | -498.2      |
| 204620_s_at             | VCAN        | 999.3       | 209230_s_at               | NUPR1                | -444.9      |
| 206336_at               | CXCL6       | 913.0       | 218990_s_at               | SPRR3                | -379.4      |
| 212489_at               | COL5A1      | 767.0       | 222484_s_at               | CXCL14               | -329.0      |
| 229273_at               | SALL1       | 667.3       | 205234_at                 | SLC16A4              | -300.7      |
| 208121_s_at             | PTPRO       | 649.8       | 243754_at                 | ---                  | -296.0      |
| 206026_s_at             | TNFAIP6     | 643.9       | 227736_at                 | C10orf99             | -277.8      |
| 204595_s_at             | STC1        | 598.8       | 205552_s_at               | OAS1                 | -269.2      |
| 213428_s_at             | COL6A1      | 512.4       | 230835_at                 | KRTDAP               | -215.3      |
| 230493_at               | SHISA2      | 490.8       | 235272_at                 | SBSN                 | -202.2      |
| 203325_s_at             | COL5A1      | 473.7       | 1564307_a_at              | A2ML1                | -195.4      |
| 219434_at               | TREM1       | 400.0       | 229290_at                 | DAPL1                | -190.0      |
| 204619_s_at             | VCAN        | 362.1       | 206714_at                 | ALOX15B              | -156.2      |
| 202202_s_at             | LAMA4       | 350.3       | 202086_at                 | MX1                  | -155.3      |
| 231532_at               | NCAM1       | 324.1       | 220403_s_at               | TP53AIP1             | -132.6      |
| 204421_s_at             | FGF2        | 305.4       | 239430_at                 | IGFL1                | -131.6      |
| 244552_at               | ZNF788      | 284.8       | 231928_at                 | HES2                 | -128.4      |
| 227394_at               | NCAM1       | 282.0       | 204439_at                 | IFI44L               | -126.2      |
| 226705_at               | FGFR1       | 251.6       | 239370_at                 | ---                  | -120.1      |
| 205207_at               | IL6         | 250.2       | 219909_at                 | MMP28                | -118.7      |
| 226769_at               | FIBIN       | 242.9       | 204533_at                 | CXCL10               | -110.2      |
| 212915_at               | PDZRN3      | 242.3       | 215125_s_at               | UGT1A1 <sup>#1</sup> | -108.6      |
| 224964_s_at             | GNG2        | 242.2       | 205863_at                 | S100A12              | -106.2      |
| 212843_at               | NCAM1       | 239.7       | 218559_s_at               | MAFB                 | -105.0      |
| 1554199_at              | PTPRO       | 235.6       | 211597_s_at               | HOPX                 | -103.4      |
| 212681_at               | EPB41L3     | 209.7       | 236119_s_at               | SPRR2G               | -103.1      |
| 206025_s_at             | TNFAIP6     | 199.6       | 206094_x_at               | UGT1A1 <sup>#1</sup> | -96.9       |
| 242651_at               | ---         | 192.4       | 204532_x_at               | UGT1A1 <sup>#2</sup> | -96.5       |
| 214043_at               | PTPRD       | 175.6       | 206008_at                 | TGM1                 | -95.3       |
| 226322_at               | TMTC1       | 160.7       | 209596_at                 | MXRA5                | -94.7       |
| 215646_s_at             | VCAN        | 156.7       | 207126_x_at               | UGT1A1 <sup>#2</sup> | -93.6       |
| 211571_s_at             | VCAN        | 148.2       | 239381_at                 | KLK7                 | -93.2       |
| 229485_x_at             | SHISA3      | 144.7       | 223919_at                 | TP53AIP1             | -89.6       |



| Upregulated (> 10-fold) |              |       | Downregulated (> 10-fold) |                      |       |
|-------------------------|--------------|-------|---------------------------|----------------------|-------|
| 206290_s_at             | RGS7         | 139.2 | 232082_x_at               | SPRR3                | -85.7 |
| 228186_s_at             | RSPO3        | 134.6 | 219684_at                 | RTP4                 | -83.2 |
| 221107_at               | CHRNA9       | 133.0 | 211122_s_at               | CXCL11               | -81.7 |
| 1554997_a_at            | PTGS2        | 129.9 | 206101_at                 | ECM2                 | -81.4 |
| 208394_x_at             | ESM1         | 123.4 | 1554179_s_at              | LYNX1                | -77.4 |
| 225202_at               | RHOBTB3      | 118.6 | 1569787_at                | RFTN1                | -71.2 |
| 207442_at               | CSF3         | 118.6 | 232277_at                 | ---                  | -70.6 |
| 218469_at               | GREM1        | 113.3 | 209792_s_at               | KLK10                | -67.9 |
| 226610_at               | CENPV        | 108.8 | 202869_at                 | OAS1                 | -66.0 |
| 202976_s_at             | RHOBTB3      | 100.6 | 218182_s_at               | CLDN1                | -65.3 |
| 206508_at               | CD70         | 98.9  | 223832_s_at               | CAPNS2               | -62.8 |
| 239468_at               | MKX          | 89.0  | 242204_at                 | WFDC5                | -62.4 |
| 203708_at               | PDE4B        | 88.5  | 212977_at                 | CXCR7                | -60.5 |
| 235759_at               | ---          | 87.5  | 206125_s_at               | KLK8                 | -60.0 |
| 213817_at               | IRAK3        | 86.5  | 229327_s_at               | ---                  | -58.4 |
| 201721_s_at             | LAPTM5       | 81.9  | 206517_at                 | CDH16                | -57.0 |
| 204597_x_at             | STC1         | 78.4  | 222549_at                 | CLDN1                | -56.7 |
| 226931_at               | TMTC1        | 75.9  | 208596_s_at               | UGT1A1 <sup>#1</sup> | -54.9 |
| 228116_at               | DUXAP10      | 71.3  | 226702_at                 | CMPK2                | -54.9 |
| 205100_at               | GFPT2        | 71.2  | 223634_at                 | RASD2                | -54.8 |
| 226611_s_at             | CENPV        | 70.9  | 223920_s_at               | TP53AIP1             | -54.3 |
| 230746_s_at             | LOC100288985 | 69.7  | 236534_at                 | BNIP1                | -54.1 |
| 212764_at               | ZEB1         | 68.8  | 205470_s_at               | KLK11                | -53.9 |
| 205825_at               | PCSK1        | 68.7  | 210163_at                 | CXCL11               | -53.3 |
| 219295_s_at             | PCOLCE2      | 67.9  | 242625_at                 | RSAD2                | -53.1 |
| 219132_at               | PELI2        | 66.7  | 219593_at                 | SLC15A3              | -52.1 |
| 228107_at               | LOC100127983 | 66.0  | 243271_at                 | ---                  | -51.8 |
| 242546_at               | FLJ39632     | 63.4  | 1558764_at                | ---                  | -51.5 |
| 206204_at               | GRB14        | 62.3  | 219962_at                 | ACE2                 | -50.1 |
| 218468_s_at             | GREM1        | 61.2  | 222257_s_at               | ACE2                 | -49.9 |
| 218976_at               | DNAJC12      | 61.0  | 205185_at                 | SPINK5               | -49.8 |
| 221911_at               | ETV1         | 60.5  | 204747_at                 | IFIT3                | -48.0 |
| 201262_s_at             | BGN          | 60.4  | 213332_at                 | PAPPA2               | -46.1 |
| 206710_s_at             | EPB41L3      | 60.4  | 241417_at                 | ---                  | -46.0 |
| 211506_s_at             | IL8          | 59.8  | 218999_at                 | TMEM140              | -45.5 |
| 228333_at               | ZEB2         | 59.5  | 226560_at                 | ---                  | -44.9 |
| 205381_at               | LRRC17       | 58.7  | 208539_x_at               | SPRR2B               | -43.9 |
| 203131_at               | PDGFRA       | 58.6  | 203281_s_at               | UBA7                 | -43.5 |
| 210139_s_at             | PMP22        | 57.6  | 206363_at                 | MAF                  | -43.4 |

| Upregulated (> 10-fold) |              |      | Downregulated (> 10-fold) |           |       |
|-------------------------|--------------|------|---------------------------|-----------|-------|
| 207569_at               | ROS1         | 57.2 | 1569453_a_at              | LOC692247 | -43.4 |
| 204422_s_at             | FGF2         | 54.5 | 209794_at                 | SRGAP3    | -43.1 |
| 1557961_s_at            | LOC100127983 | 52.9 | 223502_s_at               | TNFSF13B  | -43.0 |
| 223721_s_at             | DNAJC12      | 52.6 | 204942_s_at               | ALDH3B2   | -42.9 |
| 209199_s_at             | MEF2C        | 51.7 | 39249_at                  | AQP3      | -42.9 |
| 212813_at               | JAM3         | 51.1 | 202357_s_at               | CFB       | -41.4 |
| 229288_at               | EPHA7        | 50.7 | 209800_at                 | KRT16     | -41.0 |
| 209200_at               | MEF2C        | 50.2 | 1553906_s_at              | FGD2      | -41.0 |
| 235343_at               | VASH2        | 49.4 | 240284_x_at               | EMG1      | -40.9 |
| 207558_s_at             | PITX2        | 49.1 | 214059_at                 | IFI44     | -40.6 |
| 242860_at               | ---          | 48.4 | 204415_at                 | IFI6      | -40.1 |
| 336_at                  | TBXA2R       | 47.0 | 227128_s_at               | ---       | -40.1 |
| 1556138_a_at            | COL5A1       | 45.8 | 217497_at                 | TYMP      | -39.7 |
| 1560490_at              | FAT3         | 45.6 | 227735_s_at               | C10orf99  | -39.6 |
| 204596_s_at             | STC1         | 45.3 | 219554_at                 | RHCG      | -39.5 |
| 208937_s_at             | ID1          | 43.4 | 213797_at                 | RSAD2     | -38.8 |
| 206018_at               | FOXC1        | 43.2 | 229385_s_at               | PLAC2     | -38.4 |
| 244363_at               | ROS1         | 42.9 | 201641_at                 | BST2      | -36.8 |
| 219249_s_at             | FKBP10       | 42.7 | 227717_at                 | ARHGEF37  | -36.8 |
| 222686_s_at             | CPPED1       | 42.1 | 232056_at                 | SCEL      | -36.2 |
| 224397_s_at             | TMTC1        | 41.9 | 230233_at                 | ---       | -36.2 |
| 226625_at               | TGFBR3       | 41.4 | 207571_x_at               | C1orf38   | -36.1 |
| 230147_at               | F2RL2        | 40.8 | 228486_at                 | SLC44A1   | -35.7 |
| 218541_s_at             | C8orf4       | 40.7 | 213348_at                 | CDKN1C    | -35.6 |
| 201578_at               | PODXL        | 39.7 | 225803_at                 | FBXO32    | -35.5 |
| 205081_at               | CRIP1        | 39.2 | 211002_s_at               | TRIM29    | -35.0 |
| 206835_at               | STATH        | 39.1 | 220120_s_at               | EPB41L4A  | -34.4 |
| 223614_at               | MMP16        | 39.1 | 214599_at                 | IVL       | -33.8 |
| 1557326_at              | LOC100130911 | 38.8 | 227609_at                 | EPSTI1    | -33.8 |
| 215112_x_at             | MCF2L2       | 38.4 | 1552319_a_at              | KLK8      | -33.7 |
| 203440_at               | CDH2         | 38.3 | 223075_s_at               | AIF1L     | -33.3 |
| 235696_at               | ---          | 38.2 | 211361_s_at               | SERPINB13 | -33.3 |
| 242069_at               | CBX5         | 38.1 | 220402_at                 | TP53AIP1  | -33.1 |
| 206893_at               | SALL1        | 38.1 | 224482_s_at               | RAB11FIP4 | -32.8 |
| 229088_at               | ENPP1        | 37.5 | 231033_at                 | ---       | -32.8 |
| 203685_at               | BCL2         | 36.5 | 217502_at                 | IFIT2     | -32.4 |
| 233030_at               | PNPLA3       | 36.3 | 206561_s_at               | AKR1B10   | -32.3 |
| 228653_at               | SAMD5        | 36.0 | 232375_at                 | ---       | -32.1 |
| 211776_s_at             | EPB41L3      | 36.0 | 239582_at                 | PML       | -32.1 |
| 218610_s_at             | CPPED1       | 35.5 | 229555_at                 | GALNT5    | -32.0 |

| Upregulated (> 10-fold) |           |      | Downregulated (> 10-fold)           |                      |       |
|-------------------------|-----------|------|-------------------------------------|----------------------|-------|
| 1559725_at              | ---       | 35.3 | 206553_at                           | OAS2                 | -31.9 |
| 230351_at               | LOC283481 | 34.1 | 210785_s_at                         | C1orf38              | -31.8 |
| 223253_at               | EPDR1     | 34.0 | 205749_at                           | CYP1A1               | -31.6 |
| 213610_s_at             | KLHL23    | 33.4 | 1558765_a_at                        | ---                  | -31.5 |
| 219740_at               | VASH2     | 33.0 | 206400_at                           | LGALS7 <sup>#3</sup> | -31.3 |
| 244463_at               | ADAM23    | 32.9 | 233565_s_at                         | SDCBP2               | -31.0 |
| 239135_at               | CPPED1    | 32.8 | 230986_at                           | KLF8                 | -30.7 |
| 204337_at               | RGS4      | 32.7 | 209719_x_at                         | SERPINB3             | -30.6 |
| 226278_at               | SVIP      | 32.5 | 219211_at                           | USP18                | -30.5 |
| 201261_x_at             | BGN       | 32.4 | 203407_at                           | PPL                  | -30.2 |
| 231040_at               | ---       | 31.4 | 203153_at                           | IFIT1                | -29.9 |
| 228128_x_at             | PAPPA     | 31.2 | 224328_s_at                         | LCE3D                | -29.9 |
| 206985_at               | HSD17B3   | 30.6 | 210086_at                           | HR                   | -29.5 |
| 231001_at               | FIBIN     | 30.5 | 232165_at                           | EPPK1                | -28.9 |
| 206837_at               | ALX1      | 30.4 | 207366_at                           | KCNS1                | -28.8 |
| 236029_at               | FAT3      | 30.4 | 228010_at                           | PPP2R2C              | -28.7 |
| 242346_x_at             | ---       | 30.3 | 215465_at                           | ABCA12               | -28.6 |
| 203603_s_at             | ZEB2      | 30.0 | 225328_at                           | ---                  | -28.5 |
| 206953_s_at             | LPHN2     | 29.8 | AFFX-<br>HUMISGF3A/M<br>97935_MA_at | STAT1                | -28.4 |
| 242939_at               | TFDP1     | 29.5 | 206082_at                           | HCP5                 | -27.7 |
| 225784_s_at             | ZC4H2     | 29.2 | 1556643_at                          | FAM125A              | -27.7 |
| 1569583_at              | EREG      | 29.0 | 204638_at                           | ACP5                 | -27.4 |
| 228956_at               | UGT8      | 28.9 | 222838_at                           | SLAMF7               | -27.4 |
| 214954_at               | SUSD5     | 28.9 | 230076_at                           | PITPNM3              | -27.2 |
| 230436_s_at             | CENPV     | 28.6 | 226474_at                           | NLRC5                | -27.1 |
| 226210_s_at             | MEG3      | 27.6 | 210797_s_at                         | OASL                 | -27.0 |
| 206157_at               | PTX3      | 27.1 | 206884_s_at                         | SCEL                 | -27.0 |
| 201893_x_at             | DCN       | 26.8 | 206191_at                           | ENTPD3               | -26.9 |
| 220040_x_at             | ZC4H2     | 26.6 | 235276_at                           | EPSTI1               | -26.9 |
| 224965_at               | GNG2      | 26.3 | 236359_at                           | SCN4B                | -26.8 |
| 219985_at               | HS3ST3A1  | 26.2 | 222242_s_at                         | KLK5                 | -26.5 |
| 206504_at               | CYP24A1   | 26.1 | 220432_s_at                         | CYP39A1              | -26.3 |
| 208893_s_at             | DUSP6     | 26.0 | 238327_at                           | ODF3B                | -26.3 |
| 223722_at               | DNAJC12   | 25.8 | 209030_s_at                         | CADM1                | -26.3 |
| 232636_at               | SLITRK4   | 24.8 | 1553505_at                          | A2ML1                | -26.2 |
| 206172_at               | IL13RA2   | 24.3 | 201249_at                           | SLC2A1               | -26.1 |
| 225275_at               | EDIL3     | 24.3 | 1294_at                             | UBA7                 | -25.6 |
| 205826_at               | MYOM2     | 24.1 | 232164_s_at                         | EPPK1                | -25.5 |
| 1554036_at              | ZBTB24    | 23.9 | 230314_at                           | ---                  | -25.1 |

| Upregulated (> 10-fold) |                       |      | Downregulated (> 10-fold) |           |       |
|-------------------------|-----------------------|------|---------------------------|-----------|-------|
| 204749_at               | NAP1L3                | 23.7 | 202488_s_at               | FXVD3     | -25.0 |
| 208307_at               | RBMV1A1 <sup>#4</sup> | 23.7 | 226932_at                 | SSPN      | -24.7 |
| 242881_x_at             | ---                   | 23.3 | 223720_at                 | SPINK7    | -24.7 |
| 207437_at               | NOVA1                 | 23.2 | 221013_s_at               | APOL2     | -24.6 |
| 205794_s_at             | NOVA1                 | 23.2 | 43427_at                  | ACACB     | -24.4 |
| 204880_at               | MGMT                  | 23.1 | 214797_s_at               | CDK18     | -24.0 |
| 228737_at               | TOX2                  | 22.7 | 220322_at                 | IL1F9     | -23.6 |
| 207761_s_at             | METTL7A               | 22.5 | 203747_at                 | AQP3      | -23.4 |
| 232027_at               | SYNE1                 | 21.9 | 217272_s_at               | SERPINB13 | -22.8 |
| 242486_at               | ---                   | 21.5 | 208161_s_at               | ABCC3     | -22.7 |
| 224507_s_at             | MGC12916              | 21.5 | 225728_at                 | SORBS2    | -22.7 |
| 201981_at               | PAPPA                 | 21.4 | 221698_s_at               | CLEC7A    | -22.4 |
| 210089_s_at             | LAMA4                 | 21.2 | 1559607_s_at              | GBP6      | -22.3 |
| 213905_x_at             | BGN                   | 20.6 | 230266_at                 | RAB7B     | -22.0 |
| 202435_s_at             | CYP1B1                | 20.6 | 214475_x_at               | CAPN3     | -21.9 |
| 218974_at               | SOBP                  | 20.5 | 227266_s_at               | FYB       | -21.8 |
| 224940_s_at             | PAPPA                 | 20.4 | 226403_at                 | TMC4      | -21.8 |
| 228218_at               | LSAMP                 | 20.4 | 214549_x_at               | SPRR1A    | -21.7 |
| 203980_at               | FABP4                 | 20.2 | 232116_at                 | GRHL3     | -21.6 |
| 230003_at               | ---                   | 20.1 | 210895_s_at               | CD86      | -21.6 |
| 209406_at               | BAG2                  | 20.1 | 203238_s_at               | NOTCH3    | -21.5 |
| 239033_at               | ---                   | 20.0 | 235643_at                 | SAMD9L    | -21.5 |
| 205830_at               | CLGN                  | 19.6 | 236172_at                 | LTB4R     | -21.3 |
| 202975_s_at             | RHOBTB3               | 19.6 | 219091_s_at               | MMRN2     | -21.3 |
| 202436_s_at             | CYP1B1                | 19.5 | 1555759_a_at              | CCL5      | -21.3 |
| 204947_at               | E2F1                  | 19.4 | 235175_at                 | GBP4      | -21.1 |
| 225627_s_at             | CACHD1                | 19.4 | 202575_at                 | CRABP2    | -21.1 |
| 228461_at               | SH3RF3                | 19.3 | 209032_s_at               | CADM1     | -21.1 |
| 213362_at               | PTPRD                 | 19.0 | 202790_at                 | CLDN7     | -21.0 |
| 232504_at               | LOC285628             | 18.9 | 242354_at                 | ---       | -20.9 |
| 230744_at               | FSTL1                 | 18.8 | 230708_at                 | PRICKLE1  | -20.9 |
| 229975_at               | BMPR1B                | 18.5 | 208436_s_at               | IRF7      | -20.8 |
| 1567223_at              | HMGA2                 | 18.4 | 229396_at                 | OVOL1     | -20.7 |
| 204011_at               | SPRY2                 | 18.4 | 206133_at                 | XAF1      | -20.7 |
| 239942_at               | ---                   | 18.1 | 231068_at                 | SLC47A2   | -20.5 |
| 242579_at               | BMPR1B                | 18.0 | 207708_at                 | ALOXE3    | -20.5 |
| 243597_at               | FANCB                 | 18.0 | 230075_at                 | RAB39B    | -20.5 |
| 213316_at               | KIAA1462              | 17.9 | 209919_x_at               | GGT1      | -20.3 |
| 207057_at               | SLC16A7               | 17.9 | 221680_s_at               | ETV7      | -20.3 |
| 241925_x_at             | ---                   | 17.8 | 226213_at                 | ERBB3     | -20.2 |

| Upregulated (> 10-fold) |           |      | Downregulated (> 10-fold) |           |       |
|-------------------------|-----------|------|---------------------------|-----------|-------|
| 2028_s_at               | E2F1      | 17.7 | 1568932_at                | ---       | -20.2 |
| 230752_at               | ---       | 17.7 | 228193_s_at               | C13orf15  | -20.1 |
| 209955_s_at             | FAP       | 17.7 | 203535_at                 | S100A9    | -20.1 |
| 202437_s_at             | CYP1B1    | 17.6 | 238725_at                 | IRF1      | -20.1 |
| 230372_at               | HAS2      | 17.4 | 231148_at                 | IGFL2     | -20.0 |
| 215116_s_at             | DNM1      | 17.1 | 220230_s_at               | CYB5R2    | -20.0 |
| 1554547_at              | FAM13C    | 17.0 | 211372_s_at               | IL1R2     | -19.9 |
| 203799_at               | CD302     | 16.9 | 1552584_at                | IL12RB1   | -19.8 |
| 230626_at               | TSPAN12   | 16.9 | 219209_at                 | IFIH1     | -19.8 |
| 203441_s_at             | CDH2      | 16.9 | 219863_at                 | HERC5     | -19.7 |
| 220651_s_at             | MCM10     | 16.7 | 213261_at                 | TRANK1    | -19.7 |
| 230690_at               | TUBB1     | 16.4 | 221978_at                 | HLA-F     | -19.6 |
| 211896_s_at             | DCN       | 16.4 | 216243_s_at               | IL1RN     | -19.6 |
| 211161_s_at             | COL3A1    | 15.9 | 220066_at                 | NOD2      | -19.6 |
| 212224_at               | ALDH1A1   | 15.8 | 226069_at                 | PRICKLE1  | -19.3 |
| 224941_at               | PAPPA     | 15.6 | 204963_at                 | SSPN      | -19.1 |
| 202947_s_at             | GYPC      | 15.6 | 222830_at                 | GRHL1     | -19.0 |
| 230535_s_at             | ATP5E     | 15.4 | 207655_s_at               | BLNK      | -19.0 |
| 1562133_x_at            | ZNF90     | 15.4 | 223501_at                 | TNFSF13B  | -18.9 |
| 218921_at               | SIGIRR    | 15.3 | 205011_at                 | VWA5A     | -18.7 |
| 204932_at               | TNFRSF11B | 15.3 | 210944_s_at               | CAPN3     | -18.6 |
| 209774_x_at             | CXCL2     | 15.2 | 1554921_a_at              | SCEL      | -18.6 |
| 238186_at               | ---       | 15.1 | 227642_at                 | TFCP2L1   | -18.6 |
| 204235_s_at             | GULP1     | 15.0 | 236865_at                 | ---       | -18.6 |
| 202859_x_at             | IL8       | 15.0 | 228237_at                 | PAPPA2    | -18.5 |
| 226751_at               | CNRIP1    | 15.0 | 228742_at                 | ---       | -18.4 |
| 212230_at               | PPAP2B    | 14.9 | 233325_at                 | SLC35D2   | -18.2 |
| 209866_s_at             | LPHN3     | 14.9 | 232105_at                 | ---       | -18.2 |
| 1555766_a_at            | GNG2      | 14.9 | 1555416_a_at              | ALOX15B   | -18.2 |
| 204748_at               | PTGS2     | 14.7 | 205828_at                 | MMP3      | -18.1 |
| 230954_at               | C20orf112 | 14.7 | 220266_s_at               | KLF4      | -18.1 |
| 1554640_at              | PALM2     | 14.6 | 209969_s_at               | STAT1     | -18.0 |
| 226571_s_at             | PTPRS     | 14.6 | 207131_x_at               | GGT1      | -17.9 |
| 241866_at               | SLC16A7   | 14.4 | 228617_at                 | XAF1      | -17.9 |
| 206377_at               | FOXF2     | 14.3 | 219352_at                 | HERC6     | -17.8 |
| 219525_at               | SLC47A1   | 14.0 | 220362_at                 | PSORS1C1  | -17.7 |
| 222962_s_at             | MCM10     | 14.0 | 209031_at                 | CADM1     | -17.7 |
| 230585_at               | ---       | 14.0 | 236262_at                 | MMRN2     | -17.6 |
| 1567224_at              | HMGA2     | 13.9 | 239675_at                 | LOC283143 | -17.5 |
| 228361_at               | E2F2      | 13.8 | 241931_at                 | XG        | -17.5 |

| Upregulated (> 10-fold) |           |      | Downregulated (> 10-fold) |              |       |
|-------------------------|-----------|------|---------------------------|--------------|-------|
| 204470_at               | CXCL1     | 13.8 | 230036_at                 | SAMD9L       | -17.5 |
| 211813_x_at             | DCN       | 13.8 | 208392_x_at               | SP110        | -17.4 |
| 216635_at               | ---       | 13.7 | 202708_s_at               | HIST2H2BE    | -17.4 |
| 215767_at               | ZNF804A   | 13.6 | 243386_at                 | CASZ1        | -17.4 |
| 228790_at               | FAM110B   | 13.5 | 241418_at                 | LOC344887    | -17.2 |
| 1555793_a_at            | ZFP82     | 13.5 | 223183_at                 | AGPAT3       | -17.1 |
| 213808_at               | ---       | 13.5 | 228360_at                 | LYPD6B       | -17.1 |
| 1557348_at              | ---       | 13.4 | 205206_at                 | KAL1         | -17.1 |
| 220034_at               | IRAK3     | 13.3 | 229450_at                 | IFIT3        | -17.1 |
| 229437_at               | MIR155HG  | 13.3 | 229154_at                 | LOC100288883 | -17.0 |
| 207012_at               | MMP16     | 13.3 | 203009_at                 | BCAM         | -16.9 |
| 1557129_a_at            | FAM111B   | 13.2 | 1558378_a_at              | AHNAK2       | -16.9 |
| 218332_at               | BEX1      | 13.1 | 205064_at                 | SPRR1B       | -16.7 |
| 1560297_at              | ---       | 13.1 | 229276_at                 | IGSF9        | -16.6 |
| 202664_at               | WIPF1     | 13.0 | 234931_at                 | ---          | -16.4 |
| 209094_at               | DDAH1     | 13.0 | 230526_at                 | LOC100131096 | -16.4 |
| 205499_at               | SRPX2     | 13.0 | 209348_s_at               | MAF          | -16.4 |
| 223785_at               | FANCI     | 12.8 | 202350_s_at               | MATN2        | -16.3 |
| 241710_at               | LOC728819 | 12.7 | 222793_at                 | DDX58        | -16.2 |
| 204629_at               | PARVB     | 12.6 | 227752_at                 | SPTLC3       | -16.2 |
| 204298_s_at             | LOX       | 12.6 | 230323_s_at               | TMEM45B      | -16.2 |
| 212336_at               | EPB41L1   | 12.6 | 226068_at                 | SYK          | -16.0 |
| 203069_at               | SV2A      | 12.6 | 236156_at                 | LIPA         | -16.0 |
| 222161_at               | NAALAD2   | 12.5 | 218723_s_at               | C13orf15     | -15.9 |
| 211767_at               | GINS4     | 12.4 | 208153_s_at               | FAT2         | -15.9 |
| 204401_at               | KCNN4     | 12.3 | 240218_at                 | DSCAM        | -15.8 |
| 201860_s_at             | PLAT      | 12.3 | 1555724_s_at              | TAGLN        | -15.8 |
| 206115_at               | EGR3      | 12.2 | 242281_at                 | GLUL         | -15.8 |
| 210319_x_at             | MSX2      | 12.2 | 208284_x_at               | GGT1         | -15.8 |
| 230006_s_at             | SVIP      | 12.1 | 202454_s_at               | ERBB3        | -15.6 |
| 201710_at               | MYBL2     | 12.1 | 223980_s_at               | SP110        | -15.6 |
| 221024_s_at             | SLC2A10   | 11.9 | 225283_at                 | ARRDC4       | -15.5 |
| 231078_at               | ---       | 11.9 | 202037_s_at               | SFRP1        | -15.3 |
| 214102_at               | ARAP2     | 11.8 | 238617_at                 | ---          | -15.3 |
| 243907_at               | ---       | 11.8 | 225618_at                 | ARHGAP27     | -15.3 |
| 1560425_s_at            | ---       | 11.6 | 205660_at                 | OASL         | -15.1 |
| 229465_s_at             | ---       | 11.5 | 1405_i_at                 | CCL5         | -14.9 |
| 205943_at               | TDO2      | 11.4 | 226576_at                 | ARHGAP26     | -14.8 |
| 235588_at               | ESCO2     | 11.4 | 1564383_s_at              | FLJ35934     | -14.8 |
| 1559400_s_at            | PAPPA     | 11.4 | 219764_at                 | FZD10        | -14.8 |

| Upregulated (> 10-fold) |          |      | Downregulated (> 10-fold) |                          |       |
|-------------------------|----------|------|---------------------------|--------------------------|-------|
| 213068_at               | DPT      | 11.3 | 1559883_s_at              | SAMHD1                   | -14.7 |
| 205476_at               | CCL20    | 11.3 | 230788_at                 | GCNT2                    | -14.7 |
| 1566967_at              | ---      | 11.2 | 211890_x_at               | CAPN3                    | -14.5 |
| 214079_at               | DHRS2    | 11.2 | 232729_at                 | ---                      | -14.5 |
| 236358_at               | ---      | 11.2 | 225286_at                 | ARSD                     | -14.4 |
| 1557217_a_at            | FANCB    | 11.1 | 222016_s_at               | ZNF323                   | -14.3 |
| 201508_at               | IGFBP4   | 11.1 | 227498_at                 | SOX6                     | -14.1 |
| 207554_x_at             | TBXA2R   | 10.9 | 49452_at                  | ACACB                    | -14.0 |
| 219911_s_at             | SLCO4A1  | 10.9 | 224172_at                 | ---                      | -14.0 |
| 235318_at               | FBN1     | 10.7 | 227061_at                 | ---                      | -14.0 |
| 210807_s_at             | SLC16A7  | 10.6 | 226757_at                 | IFIT2                    | -14.0 |
| 209392_at               | ENPP2    | 10.6 | 204070_at                 | RARRES3                  | -13.9 |
| 225516_at               | SLC7A2   | 10.5 | 213832_at                 | KCND3                    | -13.9 |
| 235494_at               | LSAMP    | 10.5 | 211654_x_at               | HLA-DQB1                 | -13.9 |
| 1559382_at              | C19orf42 | 10.5 | 236052_at                 | TRNP1                    | -13.8 |
| 202888_s_at             | ANPEP    | 10.5 | 206582_s_at               | GPR56                    | -13.8 |
| 1569053_at              | AP3M2    | 10.4 | 210445_at                 | FABP6                    | -13.7 |
| 219733_s_at             | SLC27A5  | 10.4 | 1558212_at                | FLJ35024                 | -13.7 |
| 201116_s_at             | CPE      | 10.3 | 212657_s_at               | IL1RN                    | -13.6 |
| 223707_at               | RPL27A   | 10.3 | 211484_s_at               | DSCAM                    | -13.5 |
| 209101_at               | CTGF     | 10.3 | 218280_x_at               | HIST2H2AA3 <sup>#5</sup> | -13.4 |
| 226991_at               | NFATC2   | 10.2 | 235352_at                 | ---                      | -13.3 |
| 204836_at               | GLDC     | 10.1 | 225987_at                 | STEAP4                   | -13.3 |
| 228551_at               | DENND5B  | 10.1 | 1554897_s_at              | RHBDL2                   | -13.3 |
| 236539_at               | PTPN22   | 10.0 | 204750_s_at               | DSC2                     | -13.2 |
| 242260_at               | MATR3    | 10.0 | 1554980_a_at              | ATF3                     | -13.2 |
|                         |          |      | 218400_at                 | OAS3                     | -13.2 |
|                         |          |      | 205483_s_at               | ISG15                    | -13.2 |
|                         |          |      | 229996_s_at               | PCGF5                    | -13.1 |
|                         |          |      | 226603_at                 | SAMD9L                   | -13.1 |
|                         |          |      | 209283_at                 | CRYAB                    | -13.1 |
|                         |          |      | 226122_at                 | PLEKHG1                  | -13.1 |
|                         |          |      | 220664_at                 | SPRR2C                   | -13.1 |
|                         |          |      | 216258_s_at               | SERPINB13                | -13.0 |
|                         |          |      | 219090_at                 | SLC24A3                  | -13.0 |
|                         |          |      | 203936_s_at               | MMP9                     | -13.0 |
|                         |          |      | 205680_at                 | MMP10                    | -12.9 |
|                         |          |      | 204503_at                 | EVPL                     | -12.9 |
|                         |          |      | 241455_at                 | C6orf132                 | -12.8 |
|                         |          |      | 243515_at                 | ---                      | -12.8 |

| Downregulated (> 10-fold) |              |       |
|---------------------------|--------------|-------|
| 205125_at                 | PLCD1        | -12.8 |
| 239085_at                 | JDP2         | -12.7 |
| 201141_at                 | GPNMB        | -12.7 |
| 1559606_at                | GBP6         | -12.7 |
| 205286_at                 | TFAP2C       | -12.6 |
| 219756_s_at               | POF1B        | -12.6 |
| 215808_at                 | KLK10        | -12.6 |
| 225241_at                 | CCDC80       | -12.5 |
| 210128_s_at               | LTB4R        | -12.5 |
| 223220_s_at               | PARP9        | -12.5 |
| 1555786_s_at              | C14orf34     | -12.5 |
| 211417_x_at               | GGT1         | -12.5 |
| 225990_at                 | BOC          | -12.4 |
| 209828_s_at               | IL16         | -12.4 |
| 236201_at                 | ---          | -12.4 |
| 219597_s_at               | DUOX1        | -12.4 |
| 219995_s_at               | ZNF750       | -12.4 |
| 229909_at                 | B4GALNT3     | -12.3 |
| 220723_s_at               | CWH43        | -12.3 |
| 218279_s_at               | HIST2H2AA3   | -12.3 |
| 220225_at                 | IRX4         | -12.3 |
| 231236_at                 | ZFP57        | -12.3 |
| 206371_at                 | FOLR3        | -12.1 |
| 239062_at                 | LOC100131096 | -12.0 |
| 209183_s_at               | C10orf10     | -12.0 |
| 1552502_s_at              | RHBDL2       | -12.0 |
| 205595_at                 | DSG3         | -11.9 |
| 236129_at                 | GALNT5       | -11.9 |
| 205778_at                 | KLK7         | -11.9 |
| 236489_at                 | GPR110       | -11.8 |
| 213361_at                 | TDRD7        | -11.8 |
| 223395_at                 | ABI3BP       | -11.7 |
| 233413_at                 | ---          | -11.7 |
| 205019_s_at               | VIPR1        | -11.7 |
| 230405_at                 | C5orf56      | -11.7 |
| 229125_at                 | KANK4        | -11.7 |
| 223385_at                 | CYP2S1       | -11.7 |
| 213661_at                 | PAMR1        | -11.6 |
| 222847_s_at               | EGLN3        | -11.6 |
| 228439_at                 | BATF2        | -11.5 |



| Downregulated (> 10-fold)   |           |       |
|-----------------------------|-----------|-------|
| 202504_at                   | TRIM29    | -11.5 |
| 209611_s_at                 | SLC1A4    | -11.5 |
| 213183_s_at                 | CDKN1C    | -11.4 |
| 209417_s_at                 | IFI35     | -11.4 |
| 240024_at                   | SEC14L2   | -11.3 |
| 1554648_a_at                | DUOXA1    | -11.3 |
| 244379_at                   | C1orf224  | -11.3 |
| 211416_x_at                 | GGTLC1    | -11.2 |
| 223784_at                   | TMEM27    | -11.2 |
| 209640_at                   | PML       | -11.1 |
| 227497_at                   | SOX6      | -11.1 |
| 222383_s_at                 | ALOXE3    | -11.0 |
| 235842_at                   | ---       | -11.0 |
| 213375_s_at                 | N4BP2L1   | -10.9 |
| 239273_s_at                 | MMP28     | -10.9 |
| 207540_s_at                 | SYK       | -10.9 |
| 227113_at                   | ADHFE1    | -10.9 |
| 224009_x_at                 | DHRS9     | -10.9 |
| 205403_at                   | IL1R2     | -10.8 |
| 239866_at                   | ---       | -10.7 |
| 207291_at                   | PRRG4     | -10.7 |
| 243702_at                   | ---       | -10.7 |
| 207048_at                   | SLC6A11   | -10.7 |
| 237986_at                   | ---       | -10.7 |
| 214399_s_at                 | KRT4      | -10.7 |
| 233641_s_at                 | FAM167A   | -10.7 |
| 236480_at                   | ---       | -10.6 |
| 209720_s_at                 | SERPINB3  | -10.6 |
| 205916_at                   | S100A7    | -10.6 |
| 232222_at                   | C18orf49  | -10.6 |
| 1555491_a_at                | C19orf66  | -10.5 |
| 230430_at                   | ENTPD2    | -10.5 |
| 230822_at                   | TMEM61    | -10.5 |
| 205860_x_at                 | FOLH1     | -10.4 |
| 239061_at                   | TPRXL     | -10.4 |
| 227091_at                   | CCDC146   | -10.4 |
| 225746_at                   | RAB11FIP4 | -10.4 |
| AFFX-HUMISGF3A/M97935_MB_at | STAT1     | -10.4 |
| 205450_at                   | PHKA1     | -10.4 |

| Downregulated (> 10-fold) |                        |       |
|---------------------------|------------------------|-------|
| 237268_at                 | DSCAM                  | -10.3 |
| 227449_at                 | EPHA4                  | -10.3 |
| 238028_at                 | C6orf132               | -10.3 |
| 240265_at                 | TRAF3IP3               | -10.3 |
| 1555929_s_at              | ---                    | -10.3 |
| 212925_at                 | C19orf21               | -10.2 |
| 227393_at                 | ANO9                   | -10.2 |
| 1558846_at                | PNLIPRP3               | -10.2 |
| 213820_s_at               | STARD5                 | -10.2 |
| 212504_at                 | DIP2C                  | -10.1 |
| 229130_at                 | ---                    | -10.1 |
| 227488_at                 | MGC16121 <sup>#6</sup> | -10.1 |
| 210480_s_at               | MYO6                   | -10.1 |
| 240390_at                 | GALNT5                 | -10.0 |
| 204288_s_at               | SORBS2                 | -10.0 |
| 57588_at                  | SLC24A3                | -10.0 |

#1, /// UGT1A10 /// UGT1A3 /// UGT1A4 /// UGT1A5 /// UGT1A6 /// UGT1A7 /// UGT1A8 /// UGT1A9; #2, /// UGT1A10 /// UGT1A4 /// UGT1A6 /// UGT1A8 /// UGT1A9; #3, /// LGALS7B; #4, /// RBMY1B /// RBMY1D /// RBMY1E /// RBMY1F /// RBMY1J; #5, /// HIST2H2AA4; #6, /// MIR503.

*ZEB1*, *ZEB2*, *CDH2* and *ID1* were highlighted in green while *NOTCH3* and *KLF4* were highlighted in red as they were validated in **Fig. 6A** or described previously (1). Note that *CDH1* (E-cadherin) was not included as this table lists the genes showing > 10-fold changes only. *CDH1* (201130\_s\_at) was 8.9-fold downregulated upon NOTCH3 knockdown. There were 3901 genes showing > 2-fold changes ( $P < 0.05$ ). The gene lists in this table were subjected to functional annotation clustering analysis using the DAVID Bioinformatics Resources 6.7, NIAID/NIH (9). The most clustered probe sets were highlighted in blue for upregulated genes (Enrichment Score: 3.58) and in yellow for downregulated gene (Enrichment score: 9.50). For example, *ZEB2*, *CDH2* (N-cadherin) and *ID1* belonged to a Gene Ontology “cell motion” along with genes such as *IL6*, *FGF2* and *PTGS2* (i.e. cyclooxygenase-2), all essential factors implicated in EMT (10). *KLF4* constituted a Gene Ontology identity “epidermal cell differentiation” along with other genes such as *IVL* (Involucrin).

## Supplementary References

1. Ohashi S, Natsuzaka M, Yashiro-Ohtani Y, Kalman RA, Nakagawa M, Wu L, et al. NOTCH1 and NOTCH3 coordinate esophageal squamous differentiation through a CSL-dependent transcriptional network. *Gastroenterology*. 2010;139:2113-23.
2. Jeffries S, Capobianco AJ. Neoplastic transformation by Notch requires nuclear localization. *Mol Cell Biol*. 2000;20:3928-41.
3. Ong CT, Cheng HT, Chang LW, Ohtsuka T, Kageyama R, Stormo GD, et al. Target selectivity of vertebrate notch proteins. Collaboration between discrete domains and CSL-binding site architecture determines activation probability. *J Biol Chem*. 2006;281:5106-19.
4. Andl CD, Mizushima T, Nakagawa H, Oyama K, Harada H, Chruma K, et al. Epidermal growth factor receptor mediates increased cell proliferation, migration, and aggregation in esophageal keratinocytes in vitro and in vivo. *J Biol Chem*. 2003;278:1824-30.
5. Okawa T, Michaylira CZ, Kalabis J, Stairs DB, Nakagawa H, Andl CD, et al. The functional interplay between EGFR overexpression, hTERT activation, and p53 mutation in esophageal epithelial cells with activation of stromal fibroblasts induces tumor development, invasion, and differentiation. *Genes Dev*. 2007;21:2788-803.
6. Harada H, Nakagawa H, Oyama K, Takaoka M, Andl CD, Jacobmeier B, et al. Telomerase induces immortalization of human esophageal keratinocytes without p16INK4a inactivation. *Mol Cancer Res*. 2003;1:729-38.

7. Kim SH, Nakagawa H, Navaraj A, Naomoto Y, Klein-Szanto AJ, Rustgi AK, et al. Tumorigenic conversion of primary human esophageal epithelial cells using oncogene combinations in the absence of exogenous Ras. *Cancer Res.* 2006;66:10415-24.
8. Darling DS, Stearman RP, Qi Y, Qiu MS, Feller JP. Expression of Zfh1/deltaEF1 protein in palate, neural progenitors, and differentiated neurons. *Gene Expr Patterns.* 2003;3:709-17.
9. Huang da W, Sherman BT, Lempicki RA. Systematic and integrative analysis of large gene lists using DAVID bioinformatics resources. *Nat Protoc.* 2009;4:44-57.
10. Thiery JP, Acloque H, Huang RY, Nieto MA. Epithelial-mesenchymal transitions in development and disease. *Cell.* 2009;139:871-90.
